# Supplementary material for: INSYDE-content: a synthetic, multi-variable flood damage model for household contents
Source: Copernicus journal article supplement (doi:10.5194/nhess-25-4317-2025), 2025-11-04
Supplement: Supplementary file 1 [file Supplement_1.pdf › Supplement_1.pdf]

## S1 Data survey

The survey for the Northern Italy case was carried out with the help of common real estate websites (immobiliare.it and idealista.it). Due to the great degree of uncertainty surrounding the completeness and quality of the data provided on these platforms, in most of the cases, only partial information could be extracted, either due to the lack of data or out of respect for privacy. In some cases, geometrical features were not coherent either. Since the postings on the websites were for single families, the entire data survey is based on individual housing units. To ascertain the authenticity and the quality of the data, only the ones that could be precisely located and had sufficient information about both the structural properties and the house contents were considered. Specifically, to be fit for the selection, the house would need to have at least the interior details of the house, main geometrical attributes, syncing architectural plans and profiles and a sufficient number of images taken from various angles to cover most of the spaces across all the rooms within the household. Due to these highly selective criteria, out of about 500 houses studied, only 60 houses were deemed fit for the analysis. Out of those 60 houses, 54 were further identified in Google Earth through the Street View feature, and several secondary measurement techniques were adopted to validate the website data. Table 1 shows the details of the information collected from the survey. The details of the surveyed houses, along with both raw and processed data, are provided in Supplement 2. In order to maintain confidentiality, the specific coordinates of the house locations have not been shared though.

**Table S1.** Information collected in the virtual survey.

| VARIABLE         | DESCRIPTION                                                                                        |
|------------------|----------------------------------------------------------------------------------------------------|
| Region           | indicates the region in Italy                                                                      |
| Location         | indicates the tentative location of the building                                                   |
| Zone             | indicates the <b>latitude &amp; longitude of the house</b>                                         |
| Easting          |                                                                                                    |
| Northing         |                                                                                                    |
| Typology         | indicates the building typology: <b>D: Detached, A: Attached &amp; Semi-Detached AP: Apartment</b> |
| Setting          | indicates if the house is inside or outside of city area; <b>Urban or Rural</b>                    |
| Year of Const.   | indicates the year of construction as specified in the real estate website                         |
| Condition        | indicates the condition of the place as specified in the real estate website                       |
| Heating          | indicates the presence and the type of heating system                                              |
| Heating Dist.    | indicates if the heating distribution is <b>Independent or Centralized</b>                         |
| Basement         | indicates the presence of a basement/cellar ( <b>YES or NO</b> )                                   |
| Height           | indicates the height of the room; <b>default value assigned as in INSYDE</b>                       |
| Finishing Level  | indicates the finishing level of the house ( <b>High, Medium, or Low</b> )                         |
| Footprint Area   | indicates the footprint area of the house                                                          |
| Surface Area     | indicates the total built area of the house                                                        |
| External Surface | indicates the ext. surface of the structure; <b>P: Plastered, M: Masonry</b>                       |
| Bedroom          | indicates the no. of bedrooms                                                                      |
| Bed Size         | indicates the size of the bed as <b>L: Double Bed and S: Single Bed</b>                            |
| Living Room      | indicates the number of living rooms                                                               |
| Kitchen          | indicates the number of kitchens                                                                   |
| Kitchen & Living | indicates if the Kitchen and Living rooms are combined ( <b>YES or NO</b> )                        |
| W/C              | indicates the number of washrooms                                                                  |
| Sofa             | indicates the no. of sofa sets                                                                     |
| Sofa Shape       | indicates the shape of the sofa as <b>L-shaped &amp; I-shaped</b>                                  |
| Single Sofa      | indicates the number of single sofas                                                               |
| Dining Table     | indicates the number of dining tables with the number of chairs                                    |
| TV               | indicates the number of TV sets                                                                    |
| TV-Base Height   | indicates the base height of the TV <b>with respect to the floor level</b>                         |

| VARIABLE            | DESCRIPTION                                                                       |
|---------------------|-----------------------------------------------------------------------------------|
| PC                  | indicates the number of PC monitors                                               |
| PC-Base Height      | indicates the base height of the PC <b>with respect to the floor level</b>        |
| Bed Wardrobe        | indicates the number of <b>L: Large</b> wardrobes present in bedrooms             |
| Decorative Wardrobe | indicates the <b>L: Large &amp; S: Small</b> wardrobes present in the living room |
| Small Wardrobe      | indicates other additional <b>S: Small</b> wardrobes in the household             |
| Kitchen Setup       | indicates the number of upper and lower cabinets including the stove              |
| Microwave           | indicates the number of microwave ovens                                           |
| Oven                | indicates the number of ovens                                                     |
| Washing Machine     | indicates the number of washing machines                                          |
| Refrigerator        | indicates the number of refrigerators                                             |
| Dishwasher          | indicates the number of dishwashers                                               |

## S2 Modelling assumptions

### S2.1 Content distribution within the house

The content distribution within the house is governed by its typology. In case of apartments, all the housing units have been considered as single floored (based on data survey). Hence, all the contents are assumed to be present within the single floor. However, for detached and semi-detached housing units, the contents can span across either one or two floors. For single floored units, the distribution is similar to that of the apartments. In the survey, it was observed that for double floored units the ground floor typically consists of the living and dining room, kitchen and bathroom. Hence, in the model, all the sofas, decorative wardrobes, kitchen and dining setups, one TV, and the rest of the electrical appliances are assumed to be within the ground floor. The upper floor is instead generally used for bed room purpose, with inclusion of additional toilets in some. Hence, additional one TV, beds and both large and small wardrobes are assumed to be in that specific floor.

### S2.2 Building use

While the model has been developed specifically for the residential buildings, the use of the ground floor may vary (e.g., garage, storage or common areas), especially in case of apartment buildings, while the ground floor in detached and semi-detached houses, irrespective of the housing units, are typically used for the residential purpose. To account for this variation, the GroundUse variable (GU) has been introduced into the model (GU=1: Residential use; GU=2: Other use).

Due to the complexity in quantifying the type and monetary value of contents in GU=2, a lump sum is assumed in the model, which randomly samples a value between 300 and 1,000 euro for each housing unit present in the building.

### S2.3 Damage driving factors

The calculation of the number of damage items is achieved by identifying the main driving factors for damage induction for each type of content and defining the corresponding damage mechanism.

In INSYDE-content, a probabilistic approach based on the use of fragility functions is adopted for describing the damage mechanisms. The model assumes a binary damage state: an undamaged state ( $ds_0$ ) or a fully damaged state ( $ds_1$ ). For each content type, fragility functions express the probability of reaching a fully damaged state, based on the event intensity measure(s) (IM). To combine this probability with the actual occurrence of a damage state for the individual exposed elements, a random value  $P_i$  is sampled from a uniform distribution between 0 and 1 and compared to the damage probability derived from the fragility function for the corresponding content type.  $P_i$  accounts for the survival probability of each item and the random nature of the implemented process serves to capture the inherent uncertainty in the damage mechanisms, reflecting the intrinsic variability in content vulnerability to the same event intensity. Consequently, if  $P_i$  falls below the damage probability calculated from the fragility function, it is considered fully damaged ( $ds_1$ ), otherwise, it remains undamaged ( $ds_0$ ).

The formulation of fragility functions is based on expert knowledge, practical experience, as well as available technical and scientific documentation.

The inundation depth and duration are considered as the primary damage driving factors, while sediment and pollution are considered secondary factors, as follows:

- *Inundation depth*: it is the main driving factor for the damage induction for all the components;
- *Inundation duration*: it is a major driving factor for the damage induction for certain components;
- *Presence of sediments*: the presence of sediments may amplify the probability of damage to the contents as compared to the clean water. In the model, it is assumed that sediments are always present ( $s = 1$ ) and contributes additional 10% damage to the damage probability resulting from either inundation depth or inundation duration only.
- *Presence of contaminants*: The presence of pollutants in flooded water may amplify the probability of damage to the contents, potentially rendering it unusable even after drying (e.g., due to the inability to clean it properly or irreversible damage to its surface coating). In cases where information is missing, the model randomly samples between  $q = 1$  (pollutant present) and  $q = 0$  (no pollutant) with equal probability, then applies 20% of the sampled value as an increment to the damage probability coming from either inundation depth or inundation duration only.

Therefore, the probability of damage to an item is influenced by both the primary and secondary factors. Specifically, the damage induced by the primary factors is adjusted by a scaling factor that accounts for the secondary factors. This scaling factor is determined by the values of sediment ( $s$ ) and pollution ( $q$ ), where the damage is increased by a factor that is the greater of either  $(1+s \cdot 0.1)$  or  $(1+q \cdot 0.2)$ .

## S2.3 Assumptions and fragility functions for the content items

### S2.3.1 BEDS

| Exposure assessment      |                                                                                                                                                                                                                                                                                                                                      |
|--------------------------|--------------------------------------------------------------------------------------------------------------------------------------------------------------------------------------------------------------------------------------------------------------------------------------------------------------------------------------|
| Assumption               | 1 Double Bed = 2 Single Beds = 1 BedLeq                                                                                                                                                                                                                                                                                              |
| Quantitative formulation | <p>Based on a regression function derived from the survey</p> $BedLeq = 0.27663 \cdot SA^{0.40914}$ <p>converted into a stepped function, as represented in the figure (showing also the uncertainty band associated to the empirical data)</p> 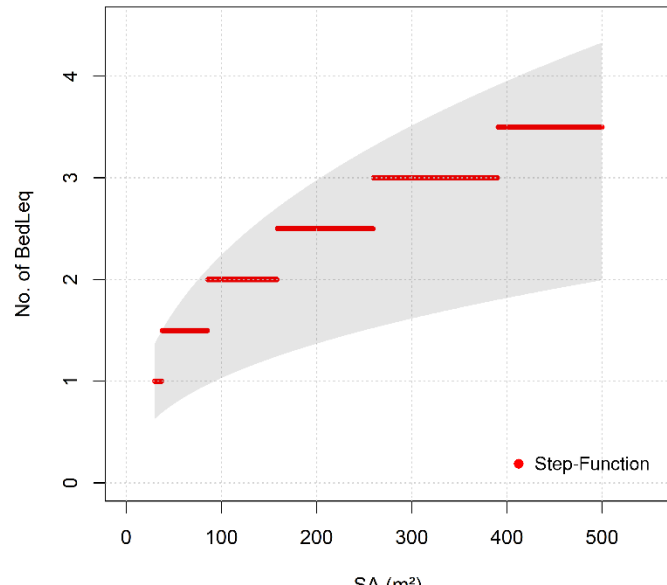 |

| Damage mechanisms                                                                  |                                                                                                                                                                                                                                                                     |
|------------------------------------------------------------------------------------|---------------------------------------------------------------------------------------------------------------------------------------------------------------------------------------------------------------------------------------------------------------------|
| Damage driving factors                                                             | Inundation depth, inundation duration, sediment and pollution                                                                                                                                                                                                       |
| <b>Fragility functions for primary factors</b><br>(truncated normal distributions) | Fragility function related to inundation depth in each floor<br>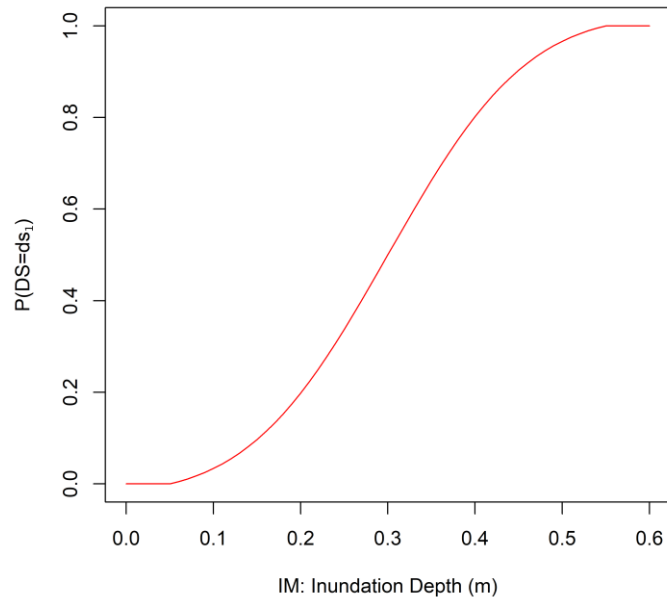                                                                                                                  |
|                                                                                    | Fragility function related to inundation duration<br>                                                                                                                            |
| <b>Explanation for the considered thresholds in the fragility functions</b>        | The inundation depth thresholds span from the floor level to the average height of the mattress base in the beds (from literature and market study). The inundation duration thresholds have been assigned based on literature review and practical considerations. |

### S2.3.2 SOFAS

| Exposure assessment             |                                                                                                                                    |
|---------------------------------|------------------------------------------------------------------------------------------------------------------------------------|
| <b>Assumption</b>               | 1 Large Sofa = 3 Single Sofa = 1 SofaLeq                                                                                           |
| <b>Quantitative formulation</b> | Based on a regression function derived from the survey<br>$\text{SofaLeq} = 0.1926 \cdot SA^{0.4434} \text{ (FL - Low \& Medium)}$ |

|                                                                                                           |                                                                                                                                                                                                                                                                                                                                                     |
|-----------------------------------------------------------------------------------------------------------|-----------------------------------------------------------------------------------------------------------------------------------------------------------------------------------------------------------------------------------------------------------------------------------------------------------------------------------------------------|
|                                                                                                           | <div><div><math display="block">SofaLeq = 0.01815 \cdot SA^{0.98228} \text{ (FL - High)}</math><p>converted into a stepped function, as represented in the figure (showing also the uncertainty band associated to the empirical data)</p></div><div>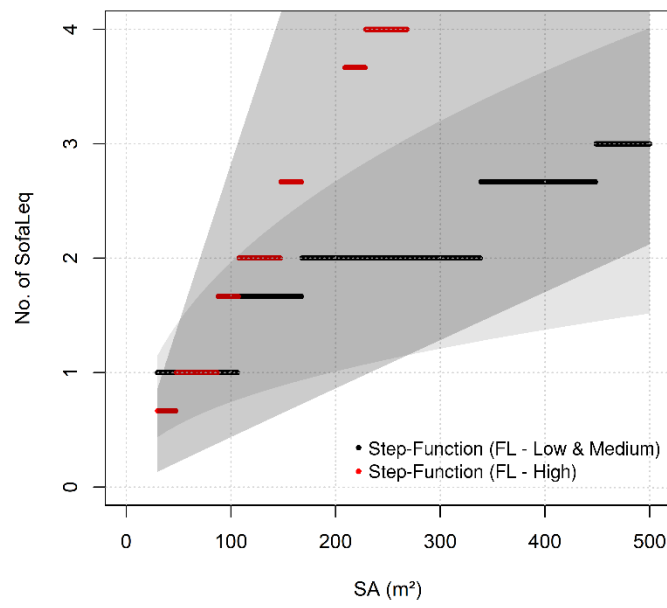</div></div> |
| <b>Damage mechanisms</b>                                                                                  |                                                                                                                                                                                                                                                                                                                                                     |
| <b>Damage driving factors</b>                                                                             | Inundation depth, inundation duration, sediment and pollution                                                                                                                                                                                                                                                                                       |
| <div><div><b>Fragility functions for primary factors</b><br/>(truncated normal distributions)</div></div> | <div><div>Fragility function related to inundation depth in each floor</div><div></div></div>                                                                                                                                                                   |

|                                                                                    |                                                                                                                                                                                                                                                                                  |
|------------------------------------------------------------------------------------|----------------------------------------------------------------------------------------------------------------------------------------------------------------------------------------------------------------------------------------------------------------------------------|
|                                                                                    | <p>Fragility function related to inundation duration</p> 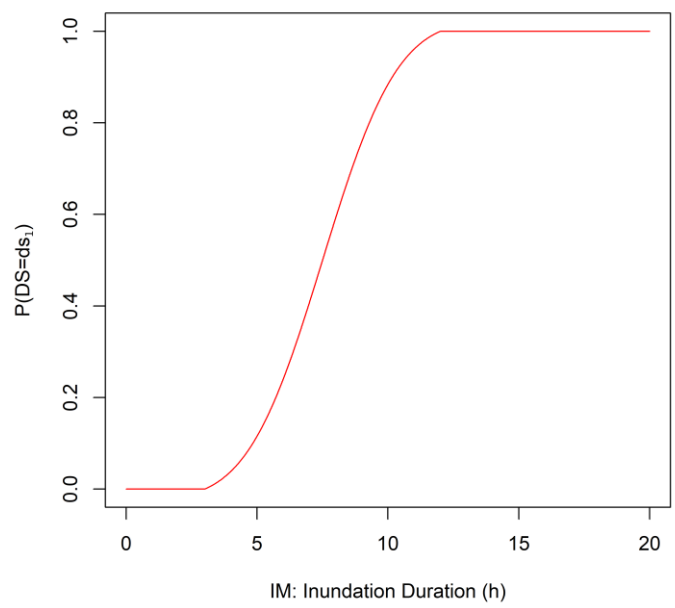 <p>IM: Inundation Duration (h)</p>                                                                                                   |
| <p><b>Explanation for the considered thresholds in the fragility functions</b></p> | <p>The inundation depth thresholds span from the floor level to the average height of the lower cushion base of the sofa (from literature and market study). The inundation duration thresholds have been assigned based on literature reviews and practical considerations.</p> |

### S2.3.3 WARDROBES

| Exposure assessment      |                                                                                                                                                                                                                                                                                                                                                |
|--------------------------|------------------------------------------------------------------------------------------------------------------------------------------------------------------------------------------------------------------------------------------------------------------------------------------------------------------------------------------------|
| Assumption               | 1 Large Bedroom Wardrobe = 1 Large Decorative Wardrobe = 4 Small Wardrobe = 1 WardrobeLeq                                                                                                                                                                                                                                                      |
| Quantitative formulation | <p>Based on a regression function derived from the survey</p> $\text{WardrobeLeq} = 0.7175 \cdot SA^{0.3309}$ <p>converted into a stepped function, as represented in the figure (showing also the uncertainty band associated to the empirical data)</p> 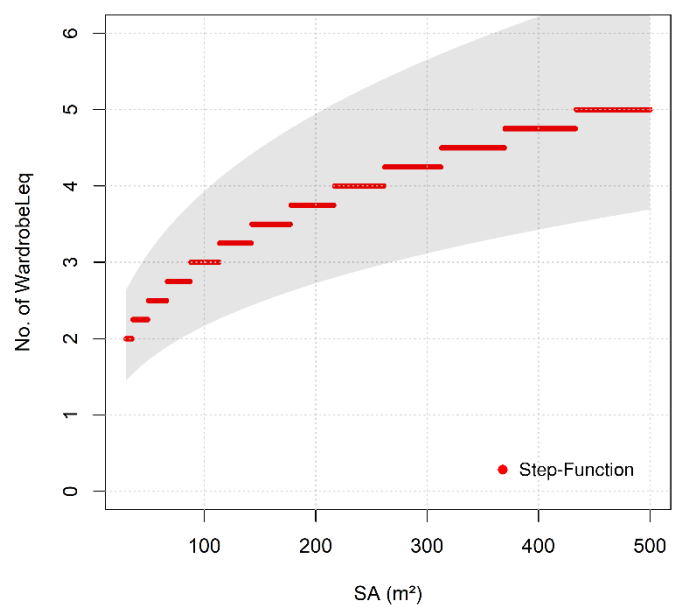 |

| Damage mechanisms                                                                  |                                                                                                                                                                                                                                                                                                                                                                                                                                                                                                                                                                                       |                          |                        |     |      |     |      |     |      |     |      |     |      |     |      |     |      |
|------------------------------------------------------------------------------------|---------------------------------------------------------------------------------------------------------------------------------------------------------------------------------------------------------------------------------------------------------------------------------------------------------------------------------------------------------------------------------------------------------------------------------------------------------------------------------------------------------------------------------------------------------------------------------------|--------------------------|------------------------|-----|------|-----|------|-----|------|-----|------|-----|------|-----|------|-----|------|
| Damage driving factors                                                             | Inundation depth, inundation duration, sediment and pollution                                                                                                                                                                                                                                                                                                                                                                                                                                                                                                                         |                          |                        |     |      |     |      |     |      |     |      |     |      |     |      |     |      |
| <b>Fragility functions for primary factors</b><br>(truncated normal distributions) | <p>Fragility function related to inundation depth in each floor for large wardrobes</p> 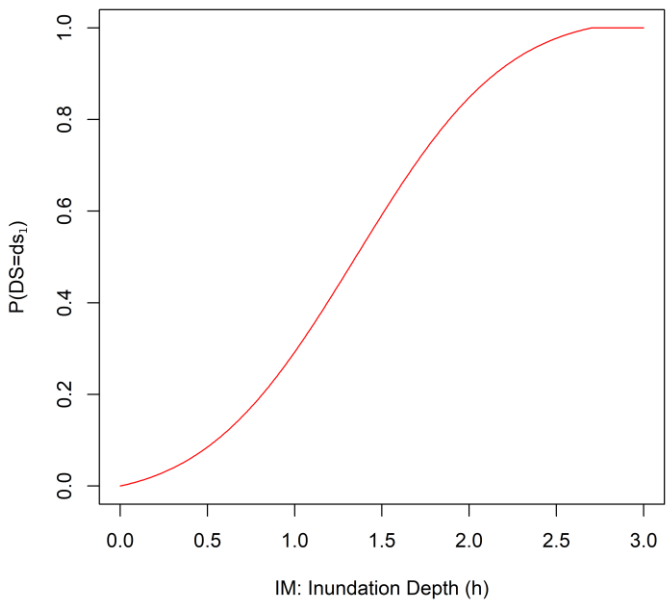 <table><caption>Data points for large wardrobes fragility function</caption><tr><th>IM: Inundation Depth (h)</th><th>P(DS=ds<sub>1</sub>)</th></tr><tr><td>0.0</td><td>0.00</td></tr><tr><td>0.5</td><td>0.08</td></tr><tr><td>1.0</td><td>0.28</td></tr><tr><td>1.5</td><td>0.58</td></tr><tr><td>2.0</td><td>0.85</td></tr><tr><td>2.5</td><td>0.98</td></tr><tr><td>3.0</td><td>1.00</td></tr></table> | IM: Inundation Depth (h) | P(DS=ds <sub>1</sub> ) | 0.0 | 0.00 | 0.5 | 0.08 | 1.0 | 0.28 | 1.5 | 0.58 | 2.0 | 0.85 | 2.5 | 0.98 | 3.0 | 1.00 |
|                                                                                    | IM: Inundation Depth (h)                                                                                                                                                                                                                                                                                                                                                                                                                                                                                                                                                              | P(DS=ds <sub>1</sub> )   |                        |     |      |     |      |     |      |     |      |     |      |     |      |     |      |
| 0.0                                                                                | 0.00                                                                                                                                                                                                                                                                                                                                                                                                                                                                                                                                                                                  |                          |                        |     |      |     |      |     |      |     |      |     |      |     |      |     |      |
| 0.5                                                                                | 0.08                                                                                                                                                                                                                                                                                                                                                                                                                                                                                                                                                                                  |                          |                        |     |      |     |      |     |      |     |      |     |      |     |      |     |      |
| 1.0                                                                                | 0.28                                                                                                                                                                                                                                                                                                                                                                                                                                                                                                                                                                                  |                          |                        |     |      |     |      |     |      |     |      |     |      |     |      |     |      |
| 1.5                                                                                | 0.58                                                                                                                                                                                                                                                                                                                                                                                                                                                                                                                                                                                  |                          |                        |     |      |     |      |     |      |     |      |     |      |     |      |     |      |
| 2.0                                                                                | 0.85                                                                                                                                                                                                                                                                                                                                                                                                                                                                                                                                                                                  |                          |                        |     |      |     |      |     |      |     |      |     |      |     |      |     |      |
| 2.5                                                                                | 0.98                                                                                                                                                                                                                                                                                                                                                                                                                                                                                                                                                                                  |                          |                        |     |      |     |      |     |      |     |      |     |      |     |      |     |      |
| 3.0                                                                                | 1.00                                                                                                                                                                                                                                                                                                                                                                                                                                                                                                                                                                                  |                          |                        |     |      |     |      |     |      |     |      |     |      |     |      |     |      |
|                                                                                    | <p>Fragility function related to inundation depth in each floor for small wardrobes</p>  <table><caption>Data points for small wardrobes fragility function</caption><tr><th>IM: Inundation Depth (h)</th><th>P(DS=ds<sub>1</sub>)</th></tr><tr><td>0.0</td><td>0.00</td></tr><tr><td>0.5</td><td>0.18</td></tr><tr><td>1.0</td><td>0.75</td></tr><tr><td>1.5</td><td>1.00</td></tr><tr><td>2.0</td><td>1.00</td></tr></table>                                                                    | IM: Inundation Depth (h) | P(DS=ds <sub>1</sub> ) | 0.0 | 0.00 | 0.5 | 0.18 | 1.0 | 0.75 | 1.5 | 1.00 | 2.0 | 1.00 |     |      |     |      |
| IM: Inundation Depth (h)                                                           | P(DS=ds <sub>1</sub> )                                                                                                                                                                                                                                                                                                                                                                                                                                                                                                                                                                |                          |                        |     |      |     |      |     |      |     |      |     |      |     |      |     |      |
| 0.0                                                                                | 0.00                                                                                                                                                                                                                                                                                                                                                                                                                                                                                                                                                                                  |                          |                        |     |      |     |      |     |      |     |      |     |      |     |      |     |      |
| 0.5                                                                                | 0.18                                                                                                                                                                                                                                                                                                                                                                                                                                                                                                                                                                                  |                          |                        |     |      |     |      |     |      |     |      |     |      |     |      |     |      |
| 1.0                                                                                | 0.75                                                                                                                                                                                                                                                                                                                                                                                                                                                                                                                                                                                  |                          |                        |     |      |     |      |     |      |     |      |     |      |     |      |     |      |
| 1.5                                                                                | 1.00                                                                                                                                                                                                                                                                                                                                                                                                                                                                                                                                                                                  |                          |                        |     |      |     |      |     |      |     |      |     |      |     |      |     |      |
| 2.0                                                                                | 1.00                                                                                                                                                                                                                                                                                                                                                                                                                                                                                                                                                                                  |                          |                        |     |      |     |      |     |      |     |      |     |      |     |      |     |      |

|                                                                                    |                                                                                                                                                                                                                                                                                                                                                                                                                                                                                                                      |
|------------------------------------------------------------------------------------|----------------------------------------------------------------------------------------------------------------------------------------------------------------------------------------------------------------------------------------------------------------------------------------------------------------------------------------------------------------------------------------------------------------------------------------------------------------------------------------------------------------------|
|                                                                                    | <p>Fragility function related to inundation duration for large and small wardrobes</p> 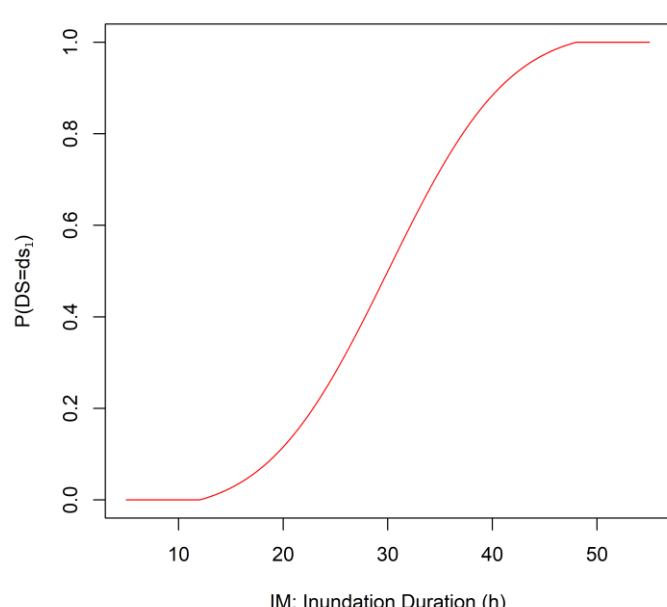                                                                                                                                                                                                                                                                                                                                            |
| <p><b>Explanation for the considered thresholds in the fragility functions</b></p> | <p>The inundation depth thresholds span from the floor level to the average height of both large and small wardrobes (from literature and market study). The same fragility functions with depth as driving factors are also adopted for the contents within the wardrobes. The commonly found items in large and small wardrobes are clothes, shoes, electrical items and other personal items. The inundation duration thresholds have been assigned based on literature reviews and practical considerations.</p> |

### S2.3.4 DINING SETUP

| Exposure assessment      |                                                                                                                                                                                                                                                                                                                                      |
|--------------------------|--------------------------------------------------------------------------------------------------------------------------------------------------------------------------------------------------------------------------------------------------------------------------------------------------------------------------------------|
| Assumption               | A table with 6 standard chairs = 6CHAIReq                                                                                                                                                                                                                                                                                            |
| Quantitative formulation | <p>Based on a regression function derived from the survey</p> $6CHAIReq = 0.1788 \cdot SA^{0.3615}$ <p>converted into a stepped function, as represented in the figure (showing also the uncertainty band associated to the empirical data)</p> 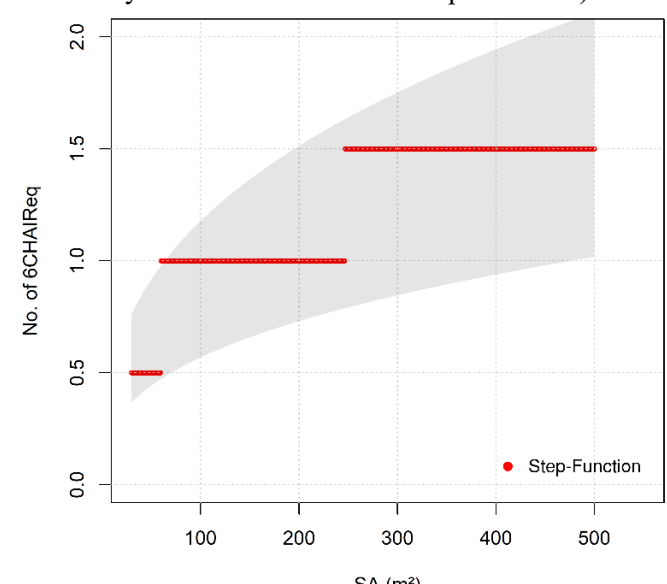 |



| Damage mechanisms                                                                  |                                                                                                                                                                                                          |
|------------------------------------------------------------------------------------|----------------------------------------------------------------------------------------------------------------------------------------------------------------------------------------------------------|
| Damage driving factors                                                             | Inundation depth, inundation duration, sediment and pollution                                                                                                                                            |
| <b>Fragility functions for primary factors</b><br>(truncated normal distributions) | <p>Fragility function related to inundation depth in each floor for dining table</p> 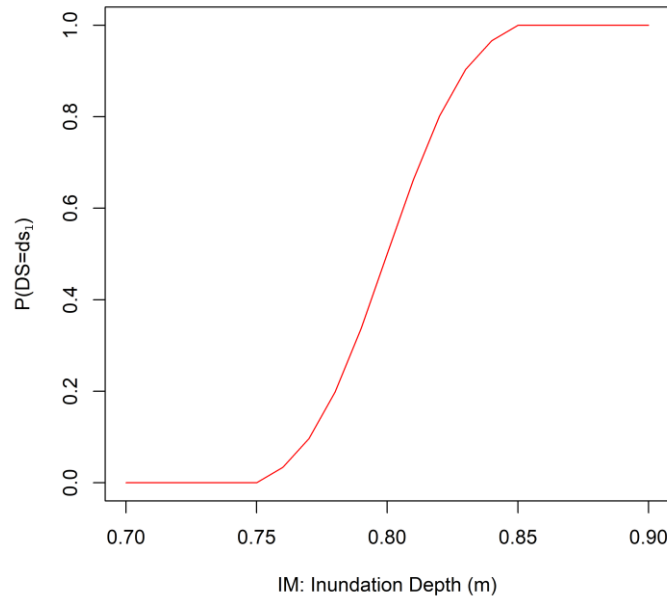 <p>IM: Inundation Depth (m)</p> |
|                                                                                    | <p>Fragility function related to inundation depth in each floor for chairs</p>  <p>IM: Inundation Depth (m)</p>      |

|                                                                             |                                                                                                                                                                                                                                                                                                         |
|-----------------------------------------------------------------------------|---------------------------------------------------------------------------------------------------------------------------------------------------------------------------------------------------------------------------------------------------------------------------------------------------------|
|                                                                             | <p>Fragility function related to inundation duration for dining setup (both table and chairs)</p> 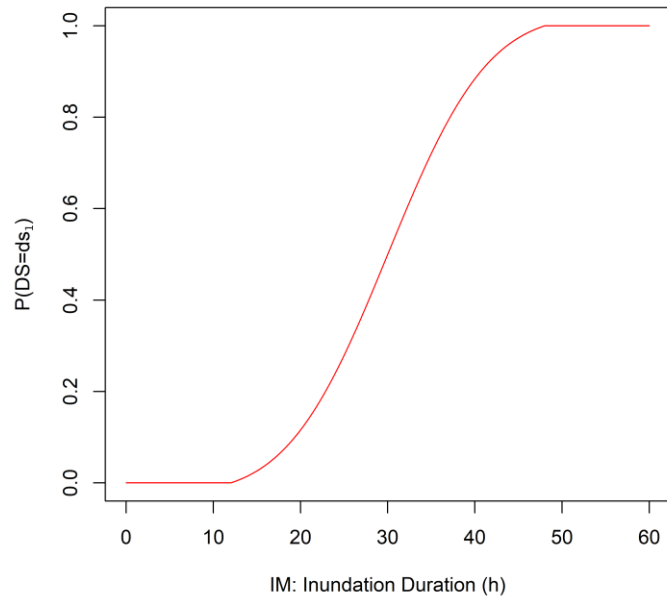 <p>IM: Inundation Duration (h)</p>                                                                                 |
| <b>Explanation for the considered thresholds in the fragility functions</b> | <p>The inundation depth thresholds for chairs and table span between the average height of the seat and the base of the table top, respectively (from literature and market study). The inundation duration thresholds have been assigned based on literature reviews and practical considerations.</p> |

### S2.3.5 KITCHEN SETUP

| Exposure assessment                                                                |                                                                                                                                                                                                             |
|------------------------------------------------------------------------------------|-------------------------------------------------------------------------------------------------------------------------------------------------------------------------------------------------------------|
| <b>Assumption</b>                                                                  | Kitchen setup indicates the combination of lower and upper cabinets                                                                                                                                         |
| <b>Quantitative formulation</b>                                                    | Each housing unit has 1 kitchen setup                                                                                                                                                                       |
| Damage mechanisms                                                                  |                                                                                                                                                                                                             |
| <b>Damage driving factors</b>                                                      | Inundation depth, inundation duration, sediment and pollution                                                                                                                                               |
| <b>Fragility functions for primary factors</b><br>(truncated normal distributions) | <p>Fragility function related to inundation depth in each floor for lower cabinets</p> 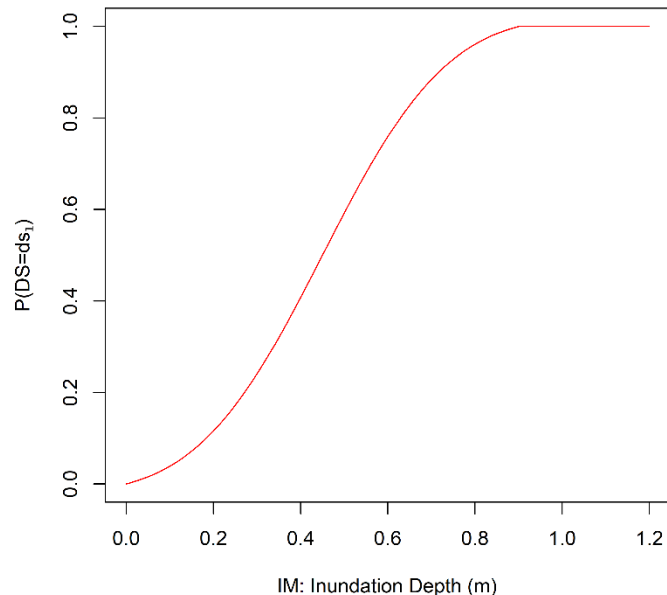 <p>IM: Inundation Depth (m)</p> |

|                                                                                    |                                                                                                                                                                                                                                                                                                                                                      |
|------------------------------------------------------------------------------------|------------------------------------------------------------------------------------------------------------------------------------------------------------------------------------------------------------------------------------------------------------------------------------------------------------------------------------------------------|
|                                                                                    | <p>Fragility function related to inundation depth in each floor for upper cabinets</p> 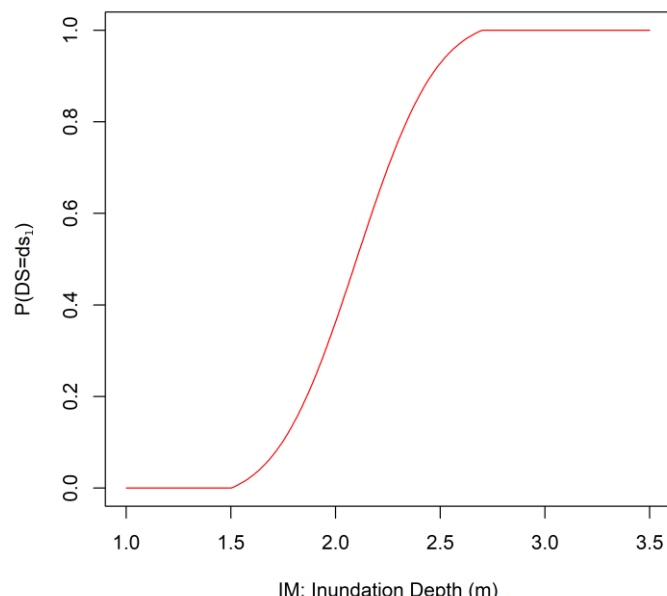 <p>Fragility function related to inundation duration for lower and upper cabinets</p>  |
| <p><b>Explanation for the considered thresholds in the fragility functions</b></p> | <p>The inundation depth thresholds for both cabinets span across their average placement heights (from literature and market study). The inundation duration thresholds have been assigned based on literature reviews and practical considerations.</p>                                                                                             |

### S2.3.6 WASHING MACHINE

|                                 |                                                                            |
|---------------------------------|----------------------------------------------------------------------------|
| <b>Exposure assessment</b>      |                                                                            |
| <b>Quantitative formulation</b> | Each housing unit has 1 washing machine (based on the survey & ISTAT data) |

| Damage mechanisms                                                                 |                                                                                                                                                    |
|-----------------------------------------------------------------------------------|----------------------------------------------------------------------------------------------------------------------------------------------------|
| Damage driving factors                                                            | Inundation depth only                                                                                                                              |
| <b>Fragility functions for primary factors</b><br>(truncated normal distribution) | Fragility function related to inundation depth in each floor<br>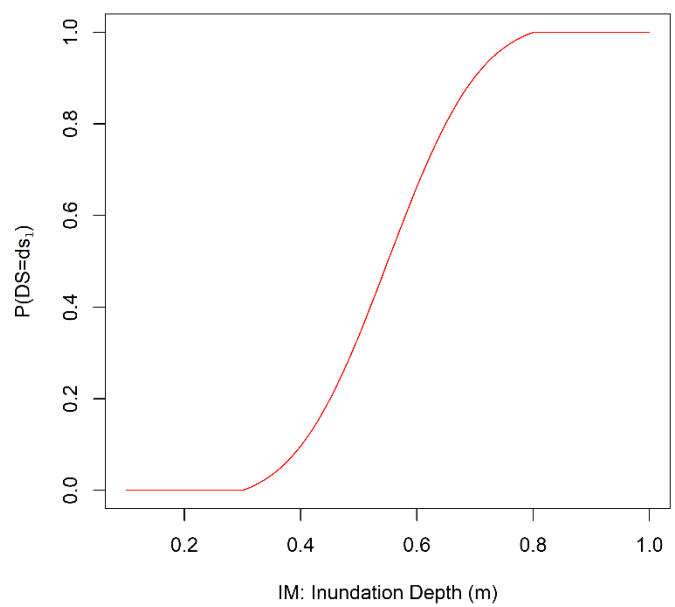 |
| Explanation for the considered thresholds in the fragility functions              | The inundation depth thresholds for the washing machine is based on the average position of the main motor component in it.                        |

### S2.3.7 TVs

| Exposure assessment                                                                                             |                                                                                                                                                      |
|-----------------------------------------------------------------------------------------------------------------|------------------------------------------------------------------------------------------------------------------------------------------------------|
| Assumption                                                                                                      | 1 TV = 1 PC = 1 TVeq                                                                                                                                 |
| Quantitative formulation                                                                                        | Each housing unit has 2 TVeq (based on the survey & ISTAT data)                                                                                      |
| Damage mechanisms                                                                                               |                                                                                                                                                      |
| Damage driving factors                                                                                          | Inundation depth only                                                                                                                                |
| <b>Fragility functions for primary factors</b><br>(empirical CDF based on base heights of TVs from survey data) | Fragility function related to inundation depth in each floor<br>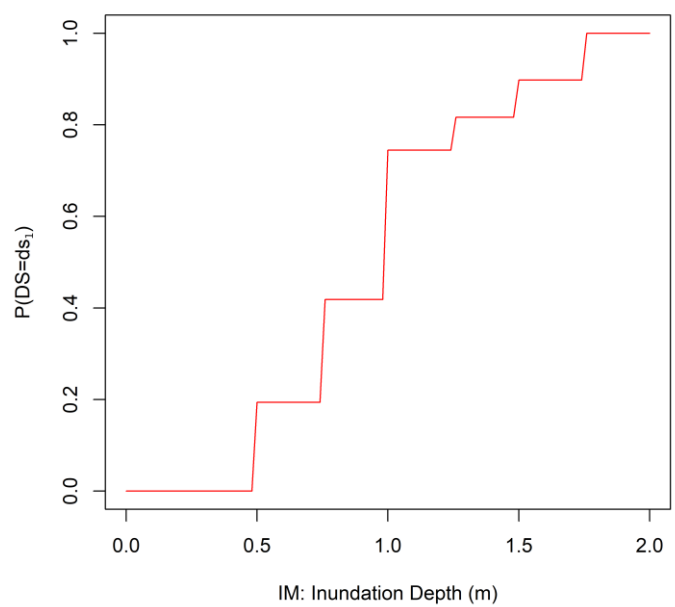 |

|                                                                             |                                                                                                                                                            |
|-----------------------------------------------------------------------------|------------------------------------------------------------------------------------------------------------------------------------------------------------|
| <b>Explanation for the considered thresholds in the fragility functions</b> | The inundation depth thresholds for the TV is based on the empirical CDF of the estimated based heights of the TVs collected during the data survey phase. |
|-----------------------------------------------------------------------------|------------------------------------------------------------------------------------------------------------------------------------------------------------|

### S2.3.8 OVEN

| Exposure assessment                                                               |                                                                                                                                         |
|-----------------------------------------------------------------------------------|-----------------------------------------------------------------------------------------------------------------------------------------|
| <b>Quantitative formulation</b>                                                   | Each housing unit has 1 oven (based on the surveyed data)                                                                               |
| Damage mechanisms                                                                 |                                                                                                                                         |
| <b>Damage driving factors</b>                                                     | Inundation depth only                                                                                                                   |
| <b>Fragility functions for primary factors</b><br>(truncated normal distribution) | <p>Fragility function related to inundation depth in each floor</p> <p>IM: Inundation Depth (m)</p>                                     |
| <b>Explanation for the considered thresholds in the fragility functions</b>       | The inundation depth thresholds for the oven is based on the average position of the bake and broil elements in it (from market study). |

**S2.3.9 REFRIGERATOR**

| <b>Exposure assessment</b>                                                        |                                                                                                                                                                                                                                                                                                                                                                                                                                                                                                                                                                                                                                                                         |                          |                        |     |     |      |     |     |      |      |      |     |     |      |      |     |      |      |     |     |     |
|-----------------------------------------------------------------------------------|-------------------------------------------------------------------------------------------------------------------------------------------------------------------------------------------------------------------------------------------------------------------------------------------------------------------------------------------------------------------------------------------------------------------------------------------------------------------------------------------------------------------------------------------------------------------------------------------------------------------------------------------------------------------------|--------------------------|------------------------|-----|-----|------|-----|-----|------|------|------|-----|-----|------|------|-----|------|------|-----|-----|-----|
| <b>Quantitative formulation</b>                                                   | Each housing unit has 1 Refrigerator (based on the surveyed data)                                                                                                                                                                                                                                                                                                                                                                                                                                                                                                                                                                                                       |                          |                        |     |     |      |     |     |      |      |      |     |     |      |      |     |      |      |     |     |     |
| <b>Damage mechanisms</b>                                                          |                                                                                                                                                                                                                                                                                                                                                                                                                                                                                                                                                                                                                                                                         |                          |                        |     |     |      |     |     |      |      |      |     |     |      |      |     |      |      |     |     |     |
| <b>Damage driving factors</b>                                                     | Inundation depth only                                                                                                                                                                                                                                                                                                                                                                                                                                                                                                                                                                                                                                                   |                          |                        |     |     |      |     |     |      |      |      |     |     |      |      |     |      |      |     |     |     |
| <b>Fragility functions for primary factors</b><br>(truncated normal distribution) | <p>Fragility function related to inundation depth in each floor</p> 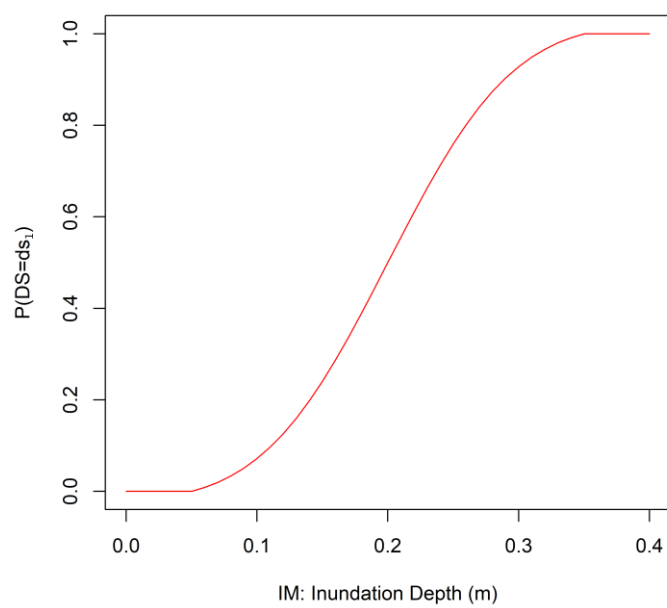 <table border="1"><caption>Data points for the fragility function curve</caption><thead><tr><th>IM: Inundation Depth (m)</th><th>P(DS=ds<sub>i</sub>)</th></tr></thead><tbody><tr><td>0.0</td><td>0.0</td></tr><tr><td>0.05</td><td>0.0</td></tr><tr><td>0.1</td><td>0.05</td></tr><tr><td>0.15</td><td>0.25</td></tr><tr><td>0.2</td><td>0.5</td></tr><tr><td>0.25</td><td>0.75</td></tr><tr><td>0.3</td><td>0.95</td></tr><tr><td>0.35</td><td>1.0</td></tr><tr><td>0.4</td><td>1.0</td></tr></tbody></table> | IM: Inundation Depth (m) | P(DS=ds <sub>i</sub> ) | 0.0 | 0.0 | 0.05 | 0.0 | 0.1 | 0.05 | 0.15 | 0.25 | 0.2 | 0.5 | 0.25 | 0.75 | 0.3 | 0.95 | 0.35 | 1.0 | 0.4 | 1.0 |
| IM: Inundation Depth (m)                                                          | P(DS=ds <sub>i</sub> )                                                                                                                                                                                                                                                                                                                                                                                                                                                                                                                                                                                                                                                  |                          |                        |     |     |      |     |     |      |      |      |     |     |      |      |     |      |      |     |     |     |
| 0.0                                                                               | 0.0                                                                                                                                                                                                                                                                                                                                                                                                                                                                                                                                                                                                                                                                     |                          |                        |     |     |      |     |     |      |      |      |     |     |      |      |     |      |      |     |     |     |
| 0.05                                                                              | 0.0                                                                                                                                                                                                                                                                                                                                                                                                                                                                                                                                                                                                                                                                     |                          |                        |     |     |      |     |     |      |      |      |     |     |      |      |     |      |      |     |     |     |
| 0.1                                                                               | 0.05                                                                                                                                                                                                                                                                                                                                                                                                                                                                                                                                                                                                                                                                    |                          |                        |     |     |      |     |     |      |      |      |     |     |      |      |     |      |      |     |     |     |
| 0.15                                                                              | 0.25                                                                                                                                                                                                                                                                                                                                                                                                                                                                                                                                                                                                                                                                    |                          |                        |     |     |      |     |     |      |      |      |     |     |      |      |     |      |      |     |     |     |
| 0.2                                                                               | 0.5                                                                                                                                                                                                                                                                                                                                                                                                                                                                                                                                                                                                                                                                     |                          |                        |     |     |      |     |     |      |      |      |     |     |      |      |     |      |      |     |     |     |
| 0.25                                                                              | 0.75                                                                                                                                                                                                                                                                                                                                                                                                                                                                                                                                                                                                                                                                    |                          |                        |     |     |      |     |     |      |      |      |     |     |      |      |     |      |      |     |     |     |
| 0.3                                                                               | 0.95                                                                                                                                                                                                                                                                                                                                                                                                                                                                                                                                                                                                                                                                    |                          |                        |     |     |      |     |     |      |      |      |     |     |      |      |     |      |      |     |     |     |
| 0.35                                                                              | 1.0                                                                                                                                                                                                                                                                                                                                                                                                                                                                                                                                                                                                                                                                     |                          |                        |     |     |      |     |     |      |      |      |     |     |      |      |     |      |      |     |     |     |
| 0.4                                                                               | 1.0                                                                                                                                                                                                                                                                                                                                                                                                                                                                                                                                                                                                                                                                     |                          |                        |     |     |      |     |     |      |      |      |     |     |      |      |     |      |      |     |     |     |
| <b>Explanation for the considered thresholds in the fragility functions</b>       | The inundation depth thresholds for the refrigerator are based on the average position of the compressor component in it (from market study)                                                                                                                                                                                                                                                                                                                                                                                                                                                                                                                            |                          |                        |     |     |      |     |     |      |      |      |     |     |      |      |     |      |      |     |     |     |

**S2.3.10 DISHWASHER**

| Exposure assessment                                                        |                                                                                                                                                         |
|----------------------------------------------------------------------------|---------------------------------------------------------------------------------------------------------------------------------------------------------|
| Assumption                                                                 | It is only present in housing units with high finishing level                                                                                           |
| Quantitative formulation                                                   | Each housing unit has 1 dishwasher (based on the surveyed data).                                                                                        |
| Damage mechanisms                                                          |                                                                                                                                                         |
| Damage driving factors                                                     | Inundation depth only                                                                                                                                   |
| Fragility functions for primary factors<br>(truncated normal distribution) | <p>Fragility function related to inundation depth in each floor</p> 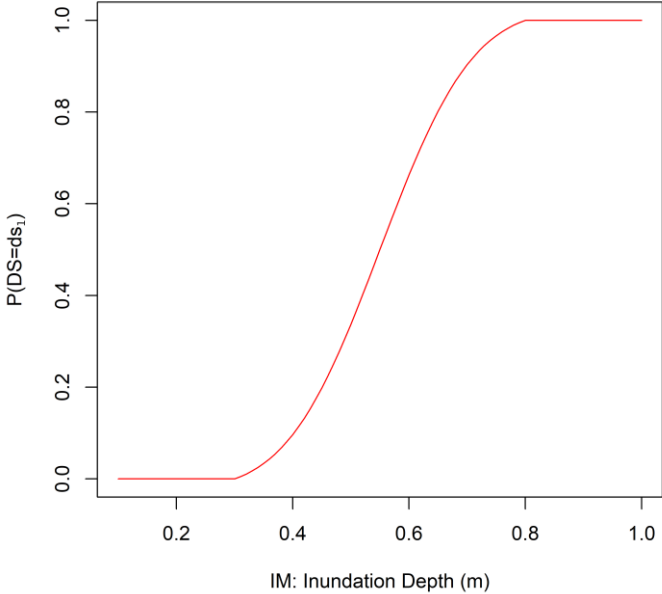 |
| Explanation for the considered thresholds in the fragility functions       | The inundation depth thresholds for the dishwasher are based on the average position of the circulation pump/motor component in it (from market study). |

S2.3.11 MICROWAVE OVEN

| Exposure assessment                                                        |                                                                                                                                                         |
|----------------------------------------------------------------------------|---------------------------------------------------------------------------------------------------------------------------------------------------------|
| Assumption                                                                 | It is only present in housing units with high finishing level                                                                                           |
| Quantitative formulation                                                   | Each housing unit has 1 microwave oven (based on the surveyed data).                                                                                    |
| Damage mechanisms                                                          |                                                                                                                                                         |
| Damage driving factors                                                     | Inundation depth only                                                                                                                                   |
| Fragility functions for primary factors<br>(truncated normal distribution) | <p>Fragility function related to inundation depth in each floor</p> 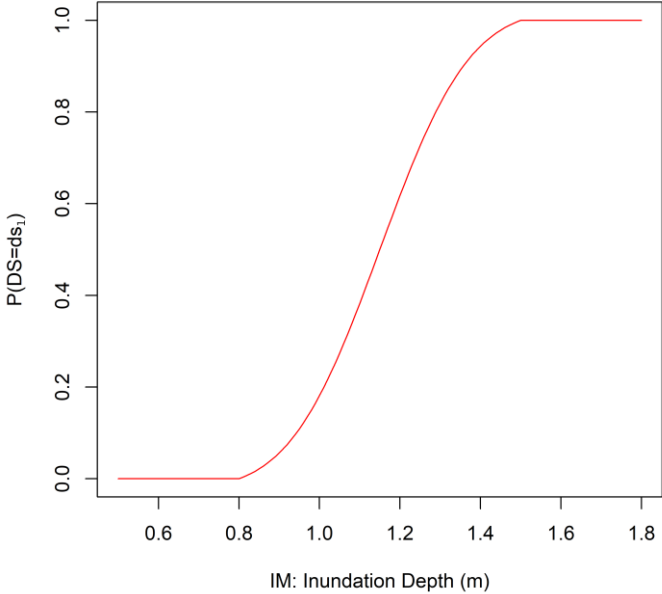 |
| Explanation for the considered thresholds in the fragility functions       | The inundation depth thresholds for the microwave oven are based on the average position of the magnetron component in it (from market study).          |



**Table S2.** Reference unit prices for the Northern Italy case (year 2023).

| House content components    | Unit price (Euro) |
|-----------------------------|-------------------|
| Single bed                  | 762               |
| Double bed                  | 1270              |
| 3-seater sofa               | 1778              |
| 2-seater sofa               | 1270              |
| Single sofa                 | 762               |
| Decorative wardrobe (frame) | 2540              |
| Large wardrobe (frame)      | 2032              |
| Small wardrobe (frame)      | 1016              |
| Large wardrobe (content)    | 1532.1            |
| Small wardrobe (content)    | 567.11            |
| Toilet cabinet              | 676.91            |
| Dining table                | 762               |
| Dining chairs (x6)          | 914.4             |
| Kitchen setup               | 4953              |
| TV                          | 614.4             |
| Refrigerator                | 609.6             |
| Oven                        | 508               |
| Washing machine             | 508               |
| Dishwasher                  | 508               |
| Microwave oven              | 200               |

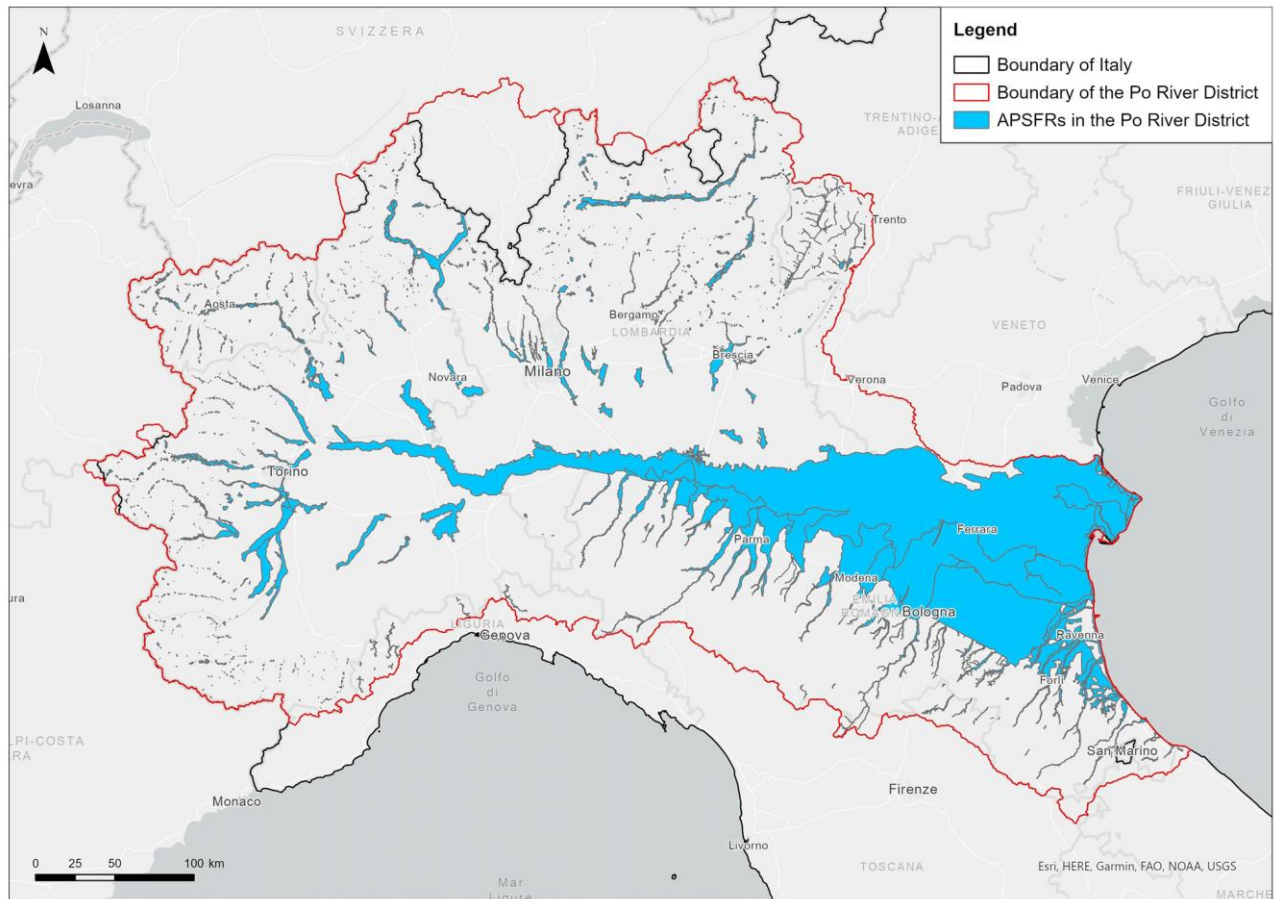

**Figure S1.** Overview of the Po River District, with indication of Areas of Potentially Significant Flood Risk (APSFRs).

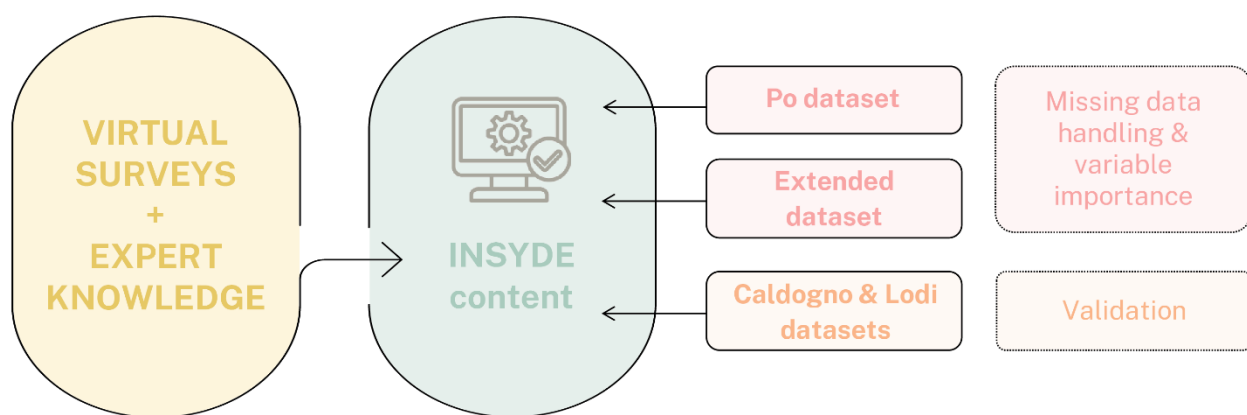

**Figure S2.** Synthetic overview of the methodological process for model development and assessment, with involved datasets.

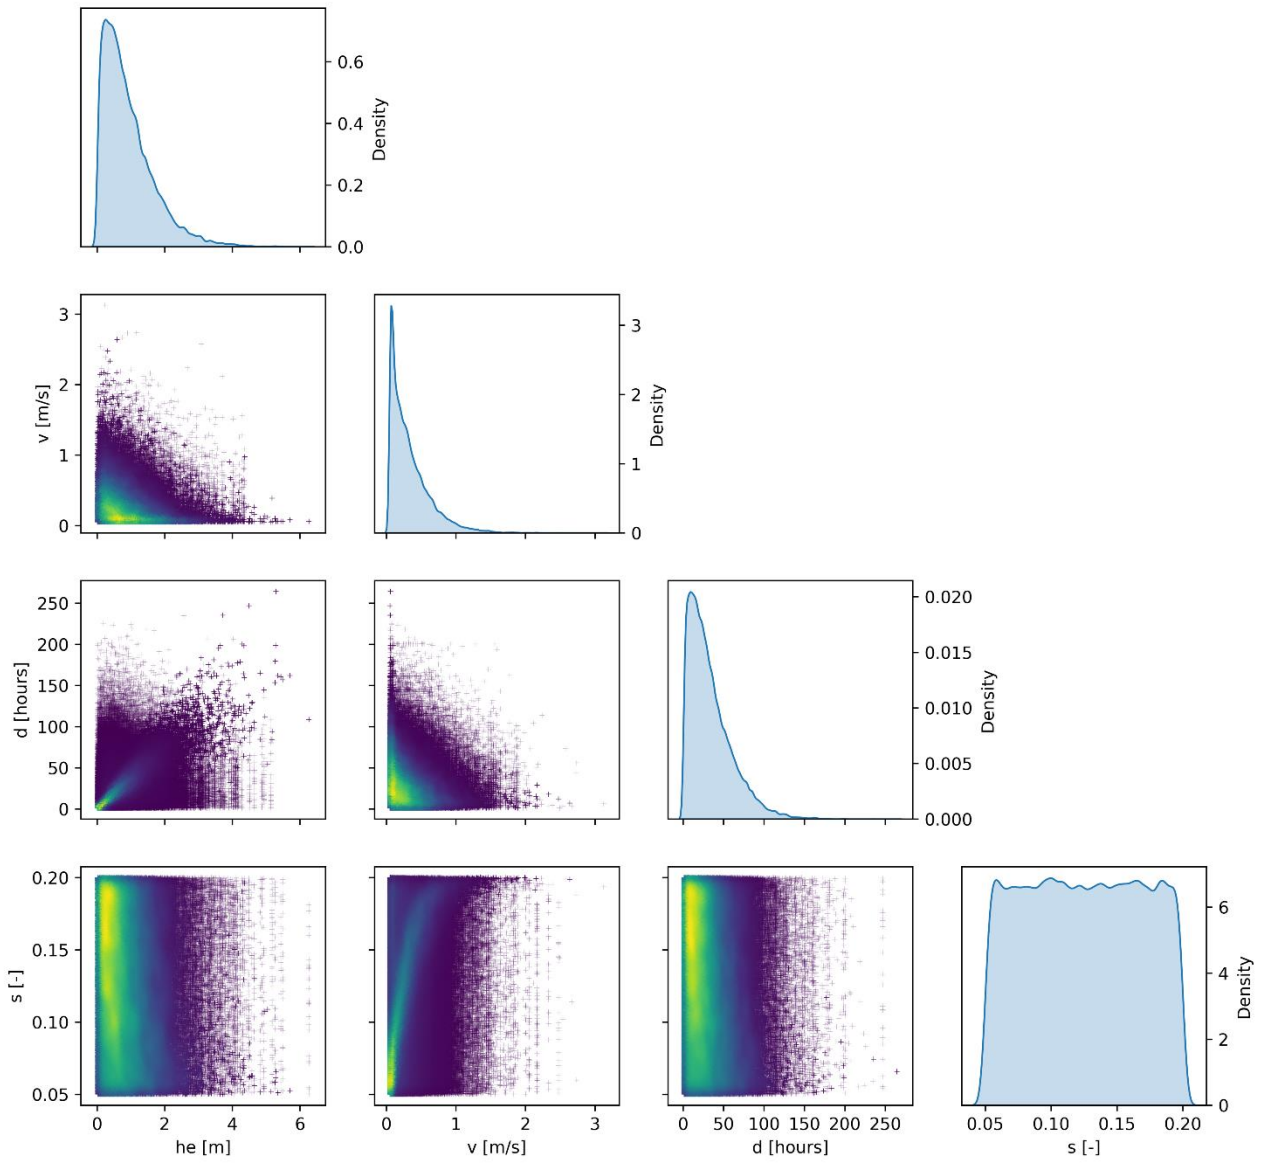

**Figure S3.** Pairwise relationships assumed for the generation of the Po River District synthetic dataset in Di Bacco et al. (2024)<sup>1</sup>: hazard variables (water depth (he), flow velocity (v), inundation duration (d) and sediment load (s)).

<sup>1</sup> Di Bacco, M., Molinari, D. & Scorzini, A.R. (2024). The value of multi-source data for improved flood damage modelling with explicit input data uncertainty treatment: INSYDE 2.0. *Natural Hazards and Earth System Sciences*, 24(5), 1681-1696. doi: 10.5194/nhess-24-1681-2024.

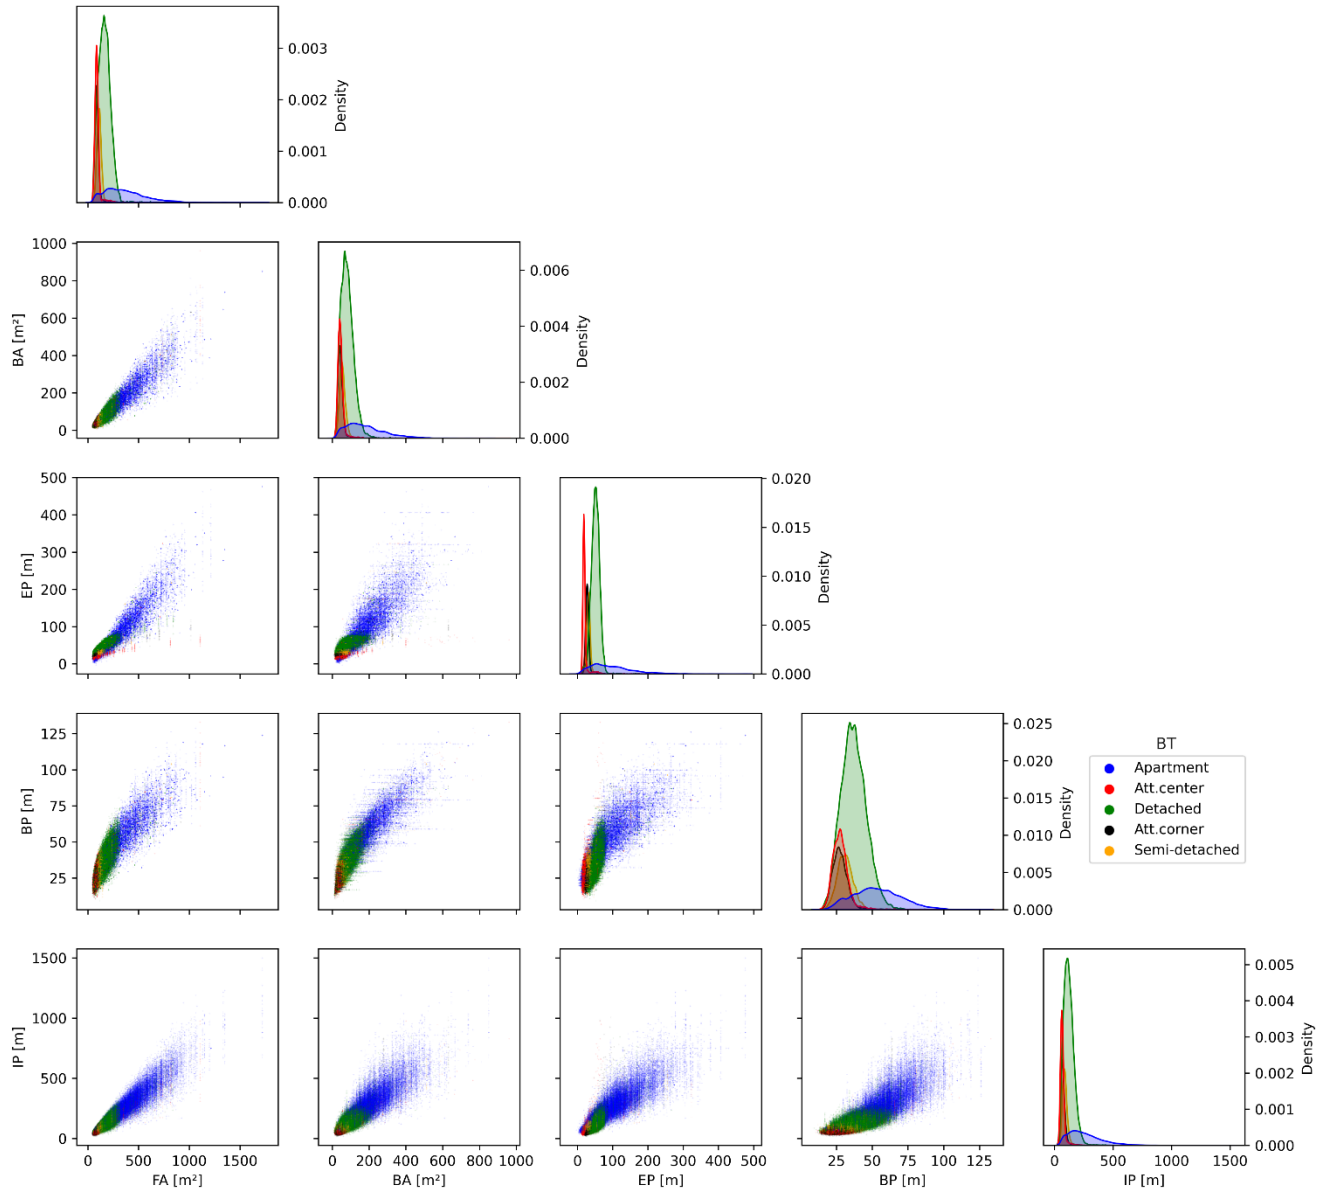

**Figure S4.** Pairwise relationships assumed for the generation of the Po River District synthetic dataset: extensive building variables (footprint (FA) and basement (BA) area; external (EP), internal (IP) and basement perimeter (BP)).

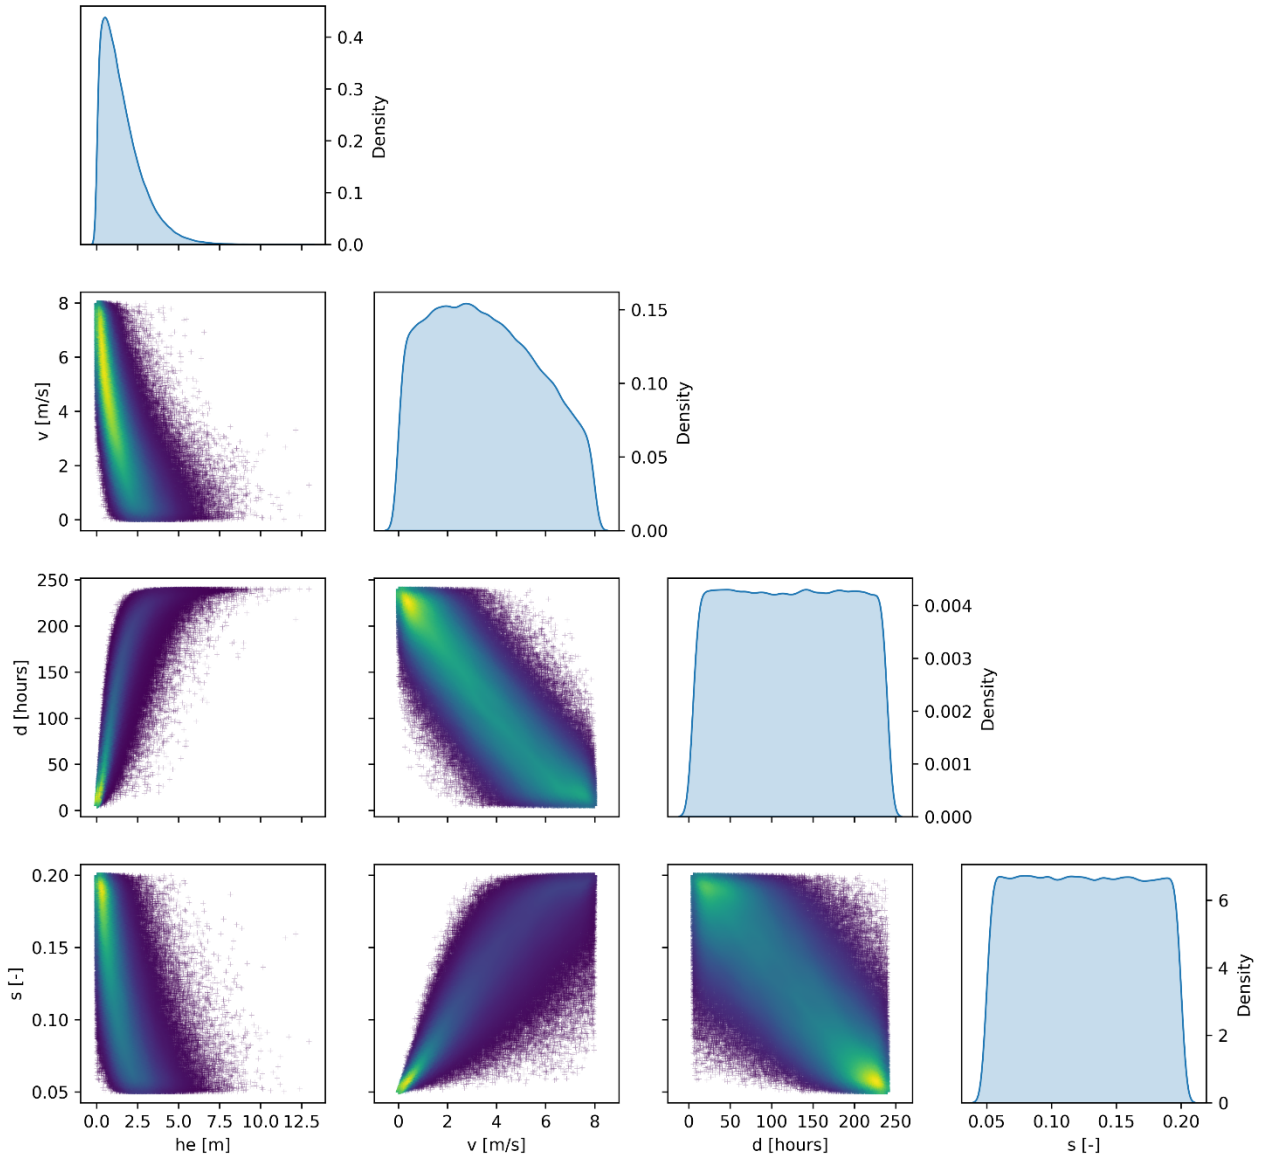

**Figure S5.** Pairwise relationships assumed for the generation of the extended synthetic dataset in Di Bacco et al. (2024): hazard variables (water depth ( $h_e$ ), flow velocity ( $v$ ), inundation duration ( $d$ ) and sediment load ( $s$ )).

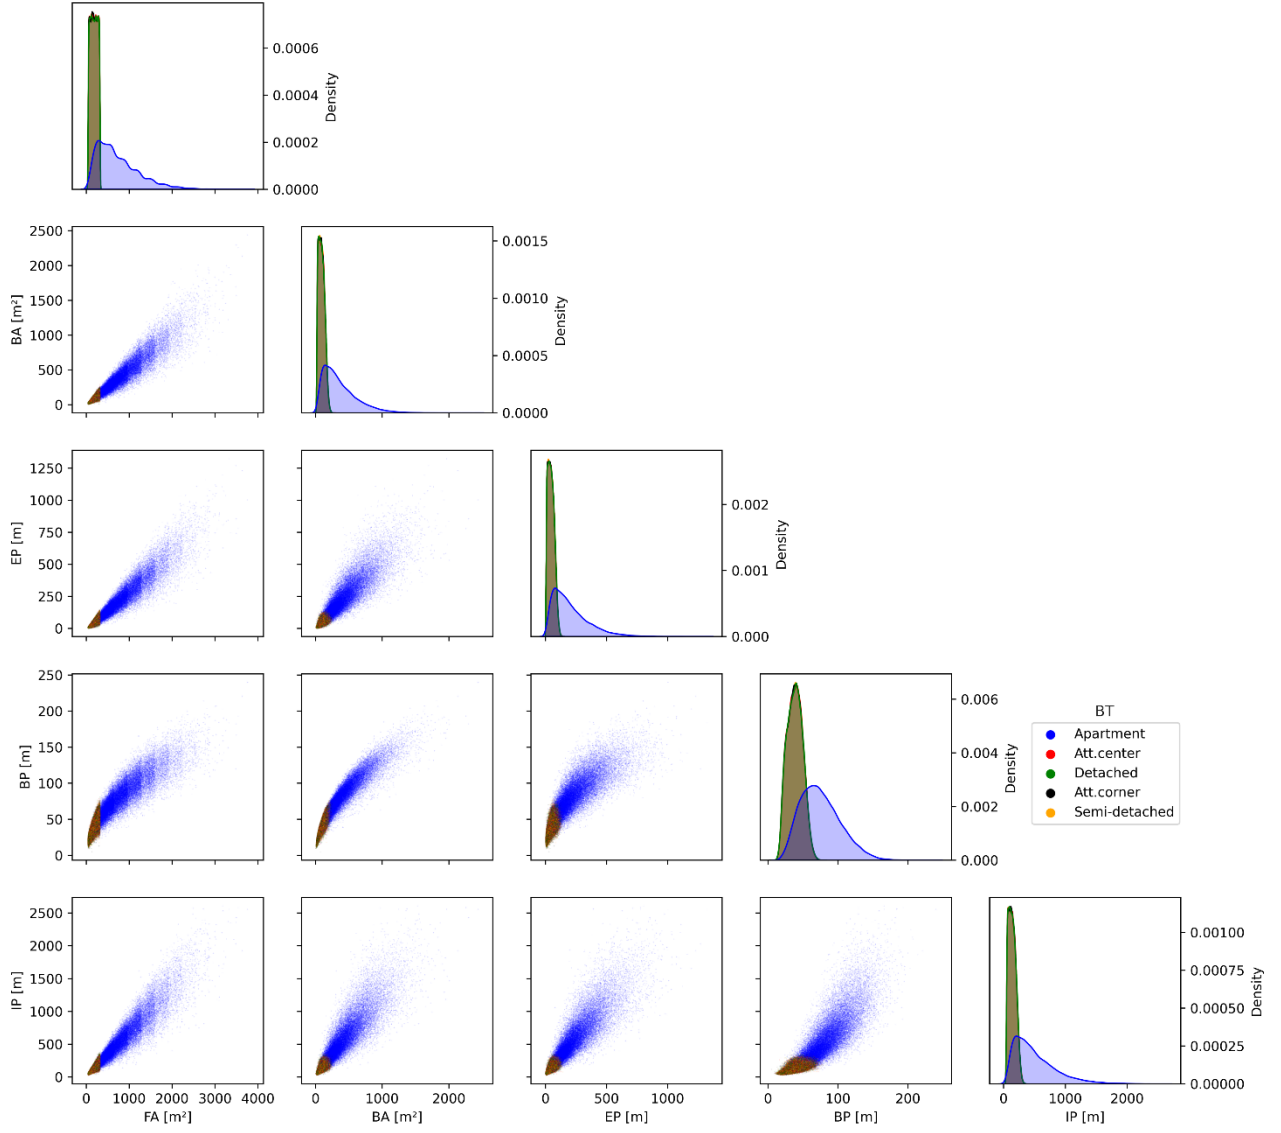

**Figure S6.** Pairwise relationships assumed for the generation of the extended synthetic dataset in Di Bacco et al. (2024): extensive building variables (footprint (FA) and basement (BA) area; external (EP), internal (IP) and basement perimeter (BP)). Uniform distributions are instead assumed for the other categorical variables in the extended dataset.

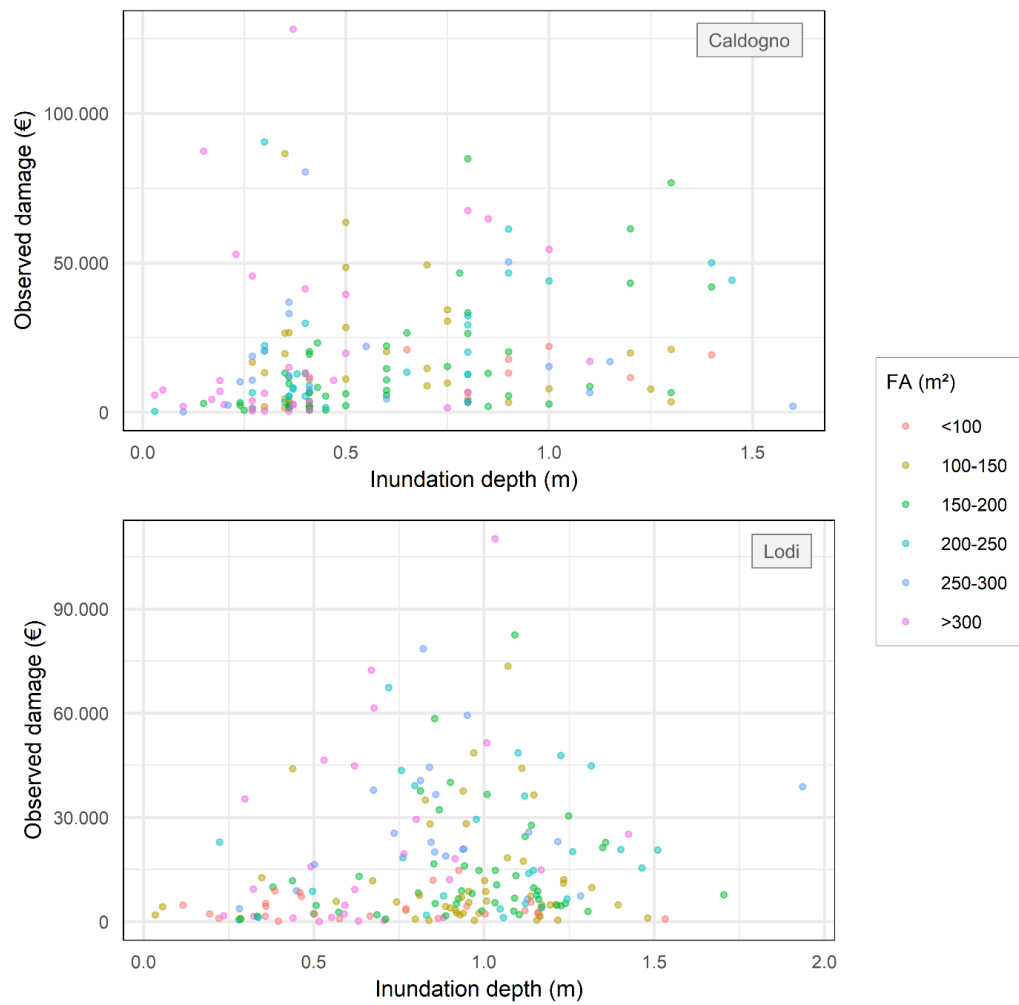

**Figure S7.** Relationship between observed content losses and inundation depth for individual buildings in Caldogno and Lodi case studies.
