# Supplementary material for: INSYDE-content: a synthetic, multi-variable flood damage model for household contents
Source: Copernicus journal article supplement (doi:10.5194/nhess-25-4317-2025), 2025-11-04
Supplement: Supplementary file 2 [file Supplement_2.pdf › Supplement_2.pdf]

## S1 Surveyed data information

**Table S1.** General information

| SN | CODE    | REGION         | LOCATION                        | SETTING | Year of Const. | CONDITION               | BASEMENT | HEIGHT (m)    |
|----|---------|----------------|---------------------------------|---------|----------------|-------------------------|----------|---------------|
| 1  | AV-D-1  | Valle d' Aosta | Villaggio Chetoz, Quart         | Rural   | 2009           | New                     | N        | 3.15          |
| 2  | L-D-1   | Lombardia      | Cornegliano Laudense            | Rural   | 1967           | Good/Habitable          | N        | 3.5 (Default) |
| 3  | L-D-2   | Lombardia      | Battista Galli, Leno            | Urban   | 1995           | Good                    | N        | 3.5 (Default) |
| 4  | L-D-3   | Lombardia      | Don Gnocchi                     | Urban   | <2000          | Good                    | N        | 3.5 (Default) |
| 5  | P-D-1   | Piedmonte      | Barca, Turin                    | Urban   | 1950           | To be refurbished       | Y        | 3.5 (Default) |
| 6  | P-D-2   | Piemonte       | Monterosso, Verbania            | Rural   | 2020           | Excellent / Refurbished | N        | 3.5 (Default) |
| 7  | P-D-3   | Piemonte       | Centro, Avigliana               | Urban   | 1985           | Good Condition          | N        | 3.5 (Default) |
| 8  | P-D-4   | Piemonte       | Sada, Avigliana                 | Rural   | 1980           | Good Condition          | N        | 2.7           |
| 9  | V-D-1   | Veneto         | Stazione, Este                  | Rural   | 2003           | Excellent / Refurbished | N        | 3.5 (Default) |
| 10 | V-D-2   | Veneto         | Cornedo, Vicentino              | Rural   | 1975           | Excellent / Refurbished | N        | 3.5 (Default) |
| 11 | ER-D-1  | Emilia Romagna | Centro, Castel San Pietro Terme | Rural   | 1970           | Good/Habitable          | N        | 3.14          |
| 12 | ER-D-2  | Emilia Romagna | Viserba, Remini                 | Urban   | 1960           | Excellent / Refurbished | N        | 2.8           |
| 13 | ER-D-3  | Emilia Romagna | Funò, Argelato                  | Urban   | 1980           | Excellent / Refurbished | N        | 3.5 (Default) |
| 14 | ER-D-4  | Emilia Romagna | Paolo Mastri, Meldola           | Urban   | 1970           | To be restructured      | N        | 3.5 (Default) |
| 15 | ER-D-5  | Emilia Romagna | San Rocco, Cesena               | Rural   | 1969           | Good/Habitable          | N        | 3.5 (Default) |
| 16 | ER-D-6  | Emilia Romagna | Sant'Egidio - Vigne, Cesena     | Urban   | 1950           | Excellent / Refurbished | N        | 3.5 (Default) |
| 17 | ER-D-7  | Emilia Romagna | San Cristoforo, Cesena          | Rural   | 1995           | Excellent / Refurbished | N        | 3.5 (Default) |
| 18 | ER-D-8  | Emilia Romagna | San Tomaso, Cesena              | Rural   | 1980           | Excellent / Refurbished | N        | 3.5 (Default) |
| 19 | ER-D-9  | Emilia Romagna | Castel Maggiore                 | Urban   | 1970           | To be restructured      | Y        | 3.5 (Default) |
| 20 | ER-D-10 | Emilia Romagna | Castel Maggiore                 | Urban   | 2008           | Good/Habitable          | Y        | 3.5 (Default) |
| 21 | ER-D-11 | Emilia Romagna | Cesare Battisti, Medicina       | Urban   | 1960           | Good/Habitable          | Y        | 3.5 (Default) |
| 22 | ER-D-12 | Emilia Romagna | Sorrivoli, Roncofreddo          | Rural   | 1950           | Good/Habitable          | Y        | 3.5 (Default) |
| 23 | AV-A-1  | Valle d' Aosta | Saint Marcel                    | Urban   | 1970           | Excellent / Refurbished | Y        | 3.5 (Default) |
| 24 | AV-A-2  | Valle d' Aosta | Aosta                           | Urban   | 2012           | Excellent / Refurbished | N        | 3.5 (Default) |
| 25 | AV-A-3  | Valle d' Aosta | Courmayeur                      | Rural   | 1900           | Excellent / Refurbished | N        | 3.5 (Default) |
| 26 | AV-A-4  | Valle d' Aosta | Lavancher, Morgex               | Rural   | 1976           | Excellent / Refurbished | Y        | 3.5 (Default) |

| SN | CODE    | REGION         | LOCATION                         | SETTING | Year of Const. | CONDITION               | BASEMENT | HEIGHT (m)    |
|----|---------|----------------|----------------------------------|---------|----------------|-------------------------|----------|---------------|
| 27 | AV-A-5  | Valle d' Aosta | Centro, Morgex                   | Rural   | 1960           | Excellent / Refurbished | N        | 3.5 (Default) |
| 28 | L-A-1   | Lombardia      | Mortara                          | Rural   | 1960           | Good Condition          | N        | 3.5 (Default) |
| 29 | L-A-2   | Lombardia      | Caionvico, Brescia               | Urban   | 1950           | Good Condition          | N        | 3.5 (Default) |
| 30 | P-A-1   | Piemonte       | Santa Rita, Turin                | Urban   | < 2005         | Good Condition          | Y        | 3             |
| 31 | P-A-2   | Piemonte       | Barca, Turin                     | Urban   | 1950           | Good Condition          | Y        | 3.5 (Default) |
| 32 | P-A-3   | Piemonte       | Moncalieri                       | Rural   | 1950           | To be refurbished       | N        | 2.42          |
| 33 | P-A-4   | Piemonte       | Centro, Cannobio                 | Rural   | 2002           | Excellent / Refurbished | Y        | 2.7           |
| 34 | P-A-5   | Piemonte       | Centro, Cherasco                 | Rural   | 2000           | Excellent / Refurbished | N        | 3.5 (Default) |
| 35 | P-A-6   | Piemonte       | Centro, Avigliana                | Urban   | 1950           | Excellent / Refurbished | N        | 3             |
| 36 | V-A-1   | Veneto         | Vicenza                          | Urban   | 1960           | Excellent / Refurbished | N        | 3.5 (Default) |
| 37 | V-A-2   | Veneto         | Ciro de Vita, Sona               | Urban   | 2013           | Excellent / Refurbished | Y        | 2.7           |
| 38 | ER-A-1  | Emilia Romagna | Calcina, Castel San Pietro Terme | Rural   | 2008           | Excellent / Refurbished | Y        | 3.5 (Default) |
| 39 | AV-AP-1 | Valle d' Aosta | Centro, Aosta                    | Urban   | < 2009         | Excellent / Refurbished | Y        | 3.5 (Default) |
| 40 | L-AP-1  | Lombardia      | San Siro, Milan                  | Urban   | 1960           | Good/Habitable          | Y        | 3.5 (Default) |
| 41 | L-AP-2  | Lombardia      | Corso San Gottardo, Milan        | Urban   | 1940           | Excellent / Refurbished | Y        | 3.5 (Default) |
| 42 | L-AP-3  | Lombardia      | Corso Genova, Milan              | Urban   | 1900           | Excellent / Refurbished | Y        | 3.5 (Default) |
| 43 | L-AP-4  | Lombardia      | Muggiano, Milan                  | Urban   | 2004           | Excellent / Refurbished | Y        | 3.5 (Default) |
| 44 | L-AP-5  | Lombardia      | Centro, Assago                   | Urban   | 1983           | Excellent / Refurbished | Y        | 3.5 (Default) |
| 45 | L-AP-6  | Lombardia      | Navigli-Darsena, Milan           | Urban   | 1960           | Excellent / Refurbished | Y        | 3.5 (Default) |
| 46 | L-AP-7  | Lombardia      | San Siro, Milan                  | Urban   | 1960           | Excellent / Refurbished | Y        | 3.5 (Default) |
| 47 | L-AP-8  | Lombardia      | Argonne-Corsica, Milan           | Urban   | 1960           | Good/Habitable          | Y        | 3.5 (Default) |
| 48 | L-AP-9  | Lombardia      | Citta Studi, Milan               | Urban   | 1920           | Excellent / Refurbished | Y        | 3.5 (Default) |
| 49 | L-AP-10 | Lombardia      | Tripoli-Soderini, Milan          | Urban   | 1965           | Excellent / Refurbished | Y        | 3.5 (Default) |
| 50 | L-AP-11 | Lombardia      | Vallone, Pavia                   | Urban   | 1960           | Good/Habitable          | Y        | 3.5 (Default) |
| 51 | P-AP-1  | Piemonte       | Centro, Cuneo                    | Urban   | 2019           | Excellent / Refurbished | Y        | 3.5 (Default) |
| 52 | P-AP-2  | Piemonte       | Centro, Cuneo                    | Urban   | 2022           | Excellent / Refurbished | Y        | 3.5 (Default) |
| 53 | P-AP-3  | Piemonte       | San Rocco Castagnaretta, Cuneo   | Urban   | 2017           | Good/Habitable          | Y        | 3.5 (Default) |
| 54 | P-AP-4  | Piemonte       | Nasi, Moncalieri                 | Urban   | 1960           | Good/Habitable          | Y        | 3.5 (Default) |

| SN | CODE    | REGION         | LOCATION                   | SETTING | Year of Const. | CONDITION               | BASEMENT | HEIGHT (m)    |
|----|---------|----------------|----------------------------|---------|----------------|-------------------------|----------|---------------|
| 55 | P-AP-5  | Lombardia      | San Paolo, Turin           | Urban   | 1970           | Good/Habitable          | Y        | 3.5 (Default) |
| 56 | ER-AP-1 | Emilia Romagna | Caster                     | Rural   | 2015           | Good/Habitable          | Y        | 2.7           |
| 57 | ER-AP-2 | Emilia Romagna | Centro, Meldola            | Rural   | 1970           | Excellent / Refurbished | Y        | 3.5 (Default) |
| 58 | ER-AP-3 | Emilia Romagna | Centro, Ozzano dell'Emilia | Rural   | 1973           | Excellent / Refurbished | Y        | 3.5 (Default) |
| 59 | ER-AP-4 | Emilia Romagna | Progresso, Castel Maggiore | Urban   | 1978           | Good/Habitable          | Y        | 3.5 (Default) |
| 60 | ER-AP-5 | Emilia Romagna | Centro, Ozzano dell'Emilia | Urban   | 1970           | Good/Habitable          | Y        | 3.5 (Default) |

**Table S2.** Housing unit characteristics

| SN | CODE   | REGION         | FEATURES |     |     |        |      | ROOM CLASSIFICATION |         |                    |         |
|----|--------|----------------|----------|-----|-----|--------|------|---------------------|---------|--------------------|---------|
|    |        |                | BT       | FL  | SA  | N<br>F | FA   | Living Room         | Kitchen | Living cum Kitchen | BedRoom |
| 1  | AV-D-1 | Valle d' Aosta | 1        | 1   | 80  | 1      | 80   | 1                   | 1       | Y                  | 1       |
| 2  | L-D-1  | Lombardia      | 1        | 1.2 | 143 | 1      | 143  | 2                   | 1       | N                  | 2       |
| 3  | L-D-2  | Lombardia      | 1        | 1.2 | 210 | 2      | 105  | 1                   | 1       | Y                  | 3       |
| 4  | L-D-3  | Lombardia      | 1        | 1.2 | 200 | 1      | 200  | 1                   | 1       | N                  | 2       |
| 5  | P-D-1  | Piemonte       | 1        | 0.8 | 85  | 1      | 85   | 1                   | 1       | N                  | 2       |
| 6  | P-D-2  | Piemonte       | 1        | 1   | 123 | 2      | 61.5 | 1                   | 1       | N                  | 2       |
| 7  | P-D-3  | Piemonte       | 1        | 0.8 | 99  | 1      | 99   | 1                   | 1       | N                  | 2       |
| 8  | P-D-4  | Piemonte       | 1        | 1.2 | 150 | 2      | 75   | 2                   | 2       | N                  | 2       |
| 9  | V-D-1  | Veneto         | 1        | 1.2 | 120 | 1      | 120  | 1                   | 1       | N                  | 3       |
| 10 | V-D-2  | Veneto         | 1        | 1   | 210 | 2      | 105  | 1                   | 1       | Y                  | 3       |
| 11 | ER-D-1 | Emilia Romagna | 1        | 1   | 85  | 1      | 85   | 1                   | 1       | N                  | 2       |
| 12 | ER-D-2 | Emilia Romagna | 1        | 1   | 81  | 1      | 81   | 1                   | 1       | Y                  | 2       |
| 13 | ER-D-3 | Emilia Romagna | 1        | 1.2 | 141 | 1      | 141  | 1                   | 1       | N                  | 2       |
| 14 | ER-D-4 | Emilia Romagna | 1        | 0.8 | 230 | 2      | 115  | 1                   | 1       | N                  | 2       |
| 15 | ER-D-5 | Emilia Romagna | 1        | 1.2 | 190 | 2      | 95   | 1                   | 1       | Y                  | 2       |
| 16 | ER-D-6 | Emilia Romagna | 1        | 1   | 200 | 2      | 100  | 1                   | 1       | Y                  | 2       |

| SN | CODE    | REGION         | FEATURES |     |       |        |       | ROOM CLASSIFICATION |         |                    |         |
|----|---------|----------------|----------|-----|-------|--------|-------|---------------------|---------|--------------------|---------|
|    |         |                | BT       | FL  | SA    | N<br>F | FA    | Living Room         | Kitchen | Living cum Kitchen | BedRoom |
| 17 | ER-D-7  | Emilia Romagna | 1        | 1   | 131.5 | 2      | 65.75 | 1                   | 1       | N                  | 2       |
| 18 | ER-D-8  | Emilia Romagna | 1        | 1.2 | 181   | 2      | 90.5  | 1                   | 1       | N                  | 4       |
| 19 | ER-D-9  | Emilia Romagna | 1        | 1   | 67    | 1      | 67    | 1                   | 1       | Y                  | 2       |
| 20 | ER-D-10 | Emilia Romagna | 1        | 1   | 92    | 1      | 92    | 1                   | 1       | N                  | 2       |
| 21 | ER-D-11 | Emilia Romagna | 1        | 1   | 80    | 1      | 80    | 1                   | 1       | N                  | 2       |
| 22 | ER-D-12 | Emilia Romagna | 1        | 1   | 165   | 2      | 82.5  | 1                   | 1       | N                  | 2       |
| 23 | AV-A-1  | Valle d' Aosta | 2        | 0.8 | 100   | 1      | 100   | 1                   | 1       | N                  | 3       |
| 24 | AV-A-2  | Valle d' Aosta | 2        | 1   | 90    | 1      | 90    | 1                   | 1       | N                  | 2       |
| 25 | AV-A-3  | Valle d' Aosta | 2        | 1   | 65    | 1      | 65    | 1                   | 1       | N                  | 1       |
| 26 | AV-A-4  | Valle d' Aosta | 2        | 1   | 54    | 1      | 54    | 1                   | 1       | Y                  | 1       |
| 27 | AV-A-5  | Valle d' Aosta | 2        | 1.2 | 44    | 1      | 44    | 1                   | 1       | Y                  | 1       |
| 28 | L-A-1   | Lombardia      | 2        | 1.2 | 90    | 1      | 90    | 1                   | 1       | N                  | 2       |
| 29 | L-A-2   | Lombardia      | 2        | 1.2 | 120   | 2      | 60    | 1                   | 1       | N                  | 2       |
| 30 | P-A-1   | Piemonte       | 2        | 0.8 | 156   | 1      | 156   | 2                   | 1       | N                  | 1       |
| 31 | P-A-2   | Piemonte       | 2        | 1   | 80    | 1      | 80    | 1                   | 1       | N                  | 2       |
| 32 | P-A-3   | Piemonte       | 2        | 1   | 170   | 2      | 85    | 1                   | 1       | N                  | 3       |
| 33 | P-A-4   | Piemonte       | 2        | 1   | 135   | 2      | 67.5  | 1                   | 1       | N                  | 2       |
| 34 | P-A-5   | Piemonte       | 2        | 1   | 65    | 1      | 65    | 2                   | 2       | Y                  | 3       |
| 35 | P-A-6   | Piemonte       | 2        | 1   | 100   | 1      | 100   | 1                   | 1       | Y                  | 1       |
| 36 | V-A-1   | Veneto         | 2        | 1   | 59    | 1      | 59    | 1                   | 1       | N                  | 2       |
| 37 | V-A-2   | Veneto         | 2        | 1   | 135   | 2      | 67.5  | 1                   | 1       | Y                  | 2       |
| 38 | ER-A-1  | Emilia Romagna | 2        | 1   | 115   | 2      | 57.5  | 1                   | 1       | Y                  | 2       |
| 39 | AV-AP-1 | Valle d' Aosta | 3        | 1   | 110   | 1      | 110   | 1                   | 1       | N                  | 2       |
| 40 | L-AP-1  | Lombardia      | 3        | 1   | 105   | 1      | 105   | 1                   | 1       | N                  | 2       |
| 41 | L-AP-2  | Lombardia      | 3        | 1   | 64    | 1      | 64    | 1                   | 1       | Y                  | 2       |
| 42 | L-AP-3  | Lombardia      | 3        | 0.8 | 77    | 1      | 77    | 1                   | 1       | Y                  | 1       |
| 43 | L-AP-4  | Lombardia      | 3        | 1   | 64    | 1      | 64    | 1                   | 1       | N                  | 1       |
| 44 | L-AP-5  | Lombardia      | 3        | 1   | 80    | 1      | 80    | 2                   | 1       | N                  | 3       |

| SN | CODE    | REGION         | FEATURES |     |     |        |     | ROOM CLASSIFICATION |         |                    |         |
|----|---------|----------------|----------|-----|-----|--------|-----|---------------------|---------|--------------------|---------|
|    |         |                | BT       | FL  | SA  | N<br>F | FA  | Living Room         | Kitchen | Living cum Kitchen | BedRoom |
| 45 | L-AP-6  | Lombardia      | 3        | 1   | 131 | 1      | 131 | 1                   | 1       | N                  | 2       |
| 46 | L-AP-7  | Lombardia      | 3        | 1   | 80  | 1      | 80  | 1                   | 1       | N                  | 2       |
| 47 | L-AP-8  | Lombardia      | 3        | 0.8 | 40  | 1      | 40  | 1                   | 1       | Y                  | 1       |
| 48 | L-AP-9  | Lombardia      | 3        | 1   | 122 | 1      | 122 | 1                   | 1       | Y                  | 2       |
| 49 | L-AP-10 | Lombardia      | 3        | 1   | 60  | 1      | 60  | 1                   | 1       | Y                  | 1       |
| 50 | L-AP-11 | Lombardia      | 3        | 1   | 90  | 1      | 90  | 1                   | 1       | N                  | 2       |
| 51 | P-AP-1  | Piemonte       | 3        | 1   | 96  | 1      | 96  | 1                   | 1       | Y                  | 2       |
| 52 | P-AP-2  | Piemonte       | 3        | 1.2 | 116 | 1      | 116 | 1                   | 1       | N                  | 3       |
| 53 | P-AP-3  | Piemonte       | 3        | 1.2 | 87  | 1      | 87  | 1                   | 1       | Y                  | 2       |
| 54 | P-AP-4  | Piemonte       | 3        | 1   | 80  | 1      | 80  | 1                   | 1       | Y                  | 2       |
| 55 | P-AP-5  | Lombardia      | 3        | 1.2 | 75  | 1      | 75  | 1                   | 1       | Y                  | 1       |
| 56 | ER-AP-1 | Emilia Romagna | 3        | 1   | 71  | 1      | 71  | 1                   | 1       | Y                  | 2       |
| 57 | ER-AP-2 | Emilia Romagna | 3        | 1   | 70  | 1      | 70  | 1                   | 1       | Y                  | 2       |
| 58 | ER-AP-3 | Emilia Romagna | 3        | 1.2 | 110 | 1      | 110 | 1                   | 1       | N                  | 2       |
| 59 | ER-AP-4 | Emilia Romagna | 3        | 1   | 101 | 1      | 101 | 1                   | 1       | N                  | 2       |
| 60 | ER-AP-5 | Emilia Romagna | 3        | 1   | 80  | 1      | 80  | 1                   | 1       | N                  | 2       |

**Table S3.** BEDLeq & SOFALeq computation

| SN | CODE   | REGION         | BED   |       |         |          | SOFA  |       |             |          |
|----|--------|----------------|-------|-------|---------|----------|-------|-------|-------------|----------|
|    |        |                | Bed_L | Bed_S | BedSeqL | BEDLeq   | SofaL | Shape | Single Sofa | SOFALeq  |
| 1  | AV-D-1 | Valle d' Aosta | 1     | 0     | 0       | <b>1</b> | 1     | L     | 0           | <b>1</b> |
| 2  | L-D-1  | Lombardia      | 1     | 2     | 1       | <b>2</b> | 2     | II    | 10          | <b>5</b> |
| 3  | L-D-2  | Lombardia      | 3     | 0     | 0       | <b>3</b> | 2     | II    | 0           | <b>2</b> |
| 4  | L-D-3  | Lombardia      | 2     | 0     | 0       | <b>2</b> | 3     | III   | 0           | <b>3</b> |
| 5  | P-D-1  | Piemonte       | 2     | 0     | 0       | <b>2</b> | 1     | I     | 0           | <b>1</b> |
| 6  | P-D-2  | Piemonte       | 1     | 2     | 1       | <b>2</b> | 1     | I     | 0           | <b>1</b> |

| SN | CODE    | REGION         | BED   |       |         |        | SOFA  |       |             |         |
|----|---------|----------------|-------|-------|---------|--------|-------|-------|-------------|---------|
|    |         |                | Bed_L | Bed_S | BedSeqL | BEDLeq | SofaL | Shape | Single Sofa | SOFALeq |
| 7  | P-D-3   | Piemonte       | 1     | 1     | 0.5     | 1.5    | 2     | II    | 0           | 2       |
| 8  | P-D-4   | Piemonte       | 1     | 2     | 1       | 2      | 3     | III   | 1           | 3       |
| 9  | V-D-1   | Veneto         | 2     | 1     | 0.5     | 2.5    | 1     | I     | 1           | 1       |
| 10 | V-D-2   | Veneto         | 2     | 1     | 0.5     | 2.5    | 1     | I     | 1           | 1       |
| 11 | ER-D-1  | Emilia Romagna | 1     | 2     | 1       | 2      | 1     | I     | 0           | 1       |
| 12 | ER-D-2  | Emilia Romagna | 1     | 2     | 1       | 2      | 1     | L     | 0           | 1       |
| 13 | ER-D-3  | Emilia Romagna | 1     | 1     | 0.5     | 1.5    | 2     | LI    | 1           | 2       |
| 14 | ER-D-4  | Emilia Romagna | 1     | 2     | 1       | 2      | 1     | I     | 3           | 2       |
| 15 | ER-D-5  | Emilia Romagna | 2     | 0     | 0       | 2      | 3     | III   | 1           | 3       |
| 16 | ER-D-6  | Emilia Romagna | 2     | 0     | 0       | 2      | 2     | II    | 1           | 2       |
| 17 | ER-D-7  | Emilia Romagna | 2     | 0     | 0       | 2      | 3     | III   | 1           | 3       |
| 18 | ER-D-8  | Emilia Romagna | 4     | 0     | 0       | 4      | 4     | III   | 4           | 5       |
| 19 | ER-D-9  | Emilia Romagna | 2     | 0     | 0       | 2      | 2     | II    | 0           | 2       |
| 20 | ER-D-10 | Emilia Romagna | 1     | 1     | 0.5     | 1.5    | 1     | L     | 0           | 1       |
| 21 | ER-D-11 | Emilia Romagna | 2     | 0     | 0       | 2      | 1     | I     | 0           | 1       |
| 22 | ER-D-12 | Emilia Romagna | 2     | 0     | 0       | 2      | 2     | II    | 0           | 2       |
| 23 | AV-A-1  | Valle d' Aosta | 3     | 0     | 0       | 3      | 1     | I     | 0           | 1       |
| 24 | AV-A-2  | Valle d' Aosta | 2     | 0     | 0       | 2      | 1     | I     | 0           | 1       |
| 25 | AV-A-3  | Valle d' Aosta | 1     | 0     | 0       | 1      | 1     | I     | 1           | 1       |
| 26 | AV-A-4  | Valle d' Aosta | 1     | 0     | 0       | 1      | 1     | I     | 0           | 1       |
| 27 | AV-A-5  | Valle d' Aosta | 1     | 0     | 0       | 1      | 2     | II    | 1           | 2       |
| 28 | L-A-1   | Lombardia      | 1     | 1     | 0.5     | 1.5    | 1     | I     | 0           | 1       |
| 29 | L-A-2   | Lombardia      | 2     | 0     | 0       | 2      | 2     | II    | 0           | 2       |
| 30 | P-A-1   | Piemonte       | 1     | 0     | 0       | 1      | 2     | II    | 1           | 2       |
| 31 | P-A-2   | Piemonte       | 1     | 2     | 1       | 2      | 1     | I     | 0           | 1       |
| 32 | P-A-3   | Piemonte       | 2     | 2     | 1       | 3      | 1     | I     | 2           | 2       |
| 33 | P-A-4   | Piemonte       | 2     | 0     | 0       | 2      | 3     | I     | 3           | 4       |
| 34 | P-A-5   | Piemonte       | 1     | 2     | 1       | 2      | 3     | III   | 1           | 3       |
| 35 | P-A-6   | Piemonte       | 1     | 0     | 0       | 1      | 1     | I     | 0           | 1       |

| SN | CODE    | REGION         | BED   |       |         |        | SOFA  |       |             |         |
|----|---------|----------------|-------|-------|---------|--------|-------|-------|-------------|---------|
|    |         |                | Bed_L | Bed_S | BedSeqL | BEDLeq | SofaL | Shape | Single Sofa | SOFALeq |
| 36 | V-A-1   | Veneto         | 1     | 2     | 1       | 2      | 1     | I     | 0           | 1       |
| 37 | V-A-2   | Veneto         | 1     | 1     | 0.5     | 1.5    | 1     | L     | 0           | 1       |
| 38 | ER-A-1  | Emilia Romagna | 2     | 1     | 0.5     | 2.5    | 2     | II    | 0           | 2       |
| 39 | AV-AP-1 | Valle d' Aosta | 1     | 1     | 0.5     | 1.5    | 1     | I     | 0           | 1       |
| 40 | L-AP-1  | Lombardia      | 1     | 1     | 0.5     | 1.5    | 2     | II    | 0           | 2       |
| 41 | L-AP-2  | Lombardia      | 1     | 1     | 0.5     | 1.5    | 1     | I     | 0           | 1       |
| 42 | L-AP-3  | Lombardia      | 1     | 0     | 0       | 1      | 1     | L     | 0           | 1       |
| 43 | L-AP-4  | Lombardia      | 1     | 0     | 0       | 1      | 1     | L     | 1           | 1       |
| 44 | L-AP-5  | Lombardia      | 1     | 2     | 1       | 2      | 2     | II    | 1           | 2       |
| 45 | L-AP-6  | Lombardia      | 2     | 1     | 0.5     | 2.5    | 2     | LI    | 1           | 2       |
| 46 | L-AP-7  | Lombardia      | 2     | 0     | 0       | 2      | 1     | I     | 0           | 1       |
| 47 | L-AP-8  | Lombardia      | 0     | 2     | 1       | 1      | 1     | I     | 0           | 1       |
| 48 | L-AP-9  | Lombardia      | 2     | 0     | 0       | 2      | 1     | L     | 0           | 1       |
| 49 | L-AP-10 | Lombardia      | 1     | 0     | 0       | 1      | 1     | I     | 1           | 1       |
| 50 | L-AP-11 | Lombardia      | 2     | 0     | 0       | 2      | 2     | II    | 2           | 3       |
| 51 | P-AP-1  | Piemonte       | 0     | 2     | 1       | 1      | 1     | I     | 0           | 1       |
| 52 | P-AP-2  | Piemonte       | 3     | 0     | 0       | 3      | 1     | L     | 0           | 1       |
| 53 | P-AP-3  | Piemonte       | 2     | 0     | 0       | 2      | 1     | L     | 0           | 1       |
| 54 | P-AP-4  | Piemonte       | 1     | 2     | 1       | 2      | 1     | I     | 0           | 1       |
| 55 | P-AP-5  | Lombardia      | 1     | 0     | 0       | 1      | 1     | I     | 0           | 1       |
| 56 | ER-AP-1 | Emilia Romagna | 1     | 1     | 0.5     | 1.5    | 1     | L     | 0           | 1       |
| 57 | ER-AP-2 | Emilia Romagna | 1     | 2     | 1       | 2      | 1     | L     | 0           | 1       |
| 58 | ER-AP-3 | Emilia Romagna | 1     | 1     | 0.5     | 1.5    | 1     | L     | 1           | 1       |
| 59 | ER-AP-4 | Emilia Romagna | 2     | 0     | 0       | 2      | 2     | I     | 1           | 2       |
| 60 | ER-AP-5 | Emilia Romagna | 1     | 2     | 1       | 2      | 1     | I     | 1           | 1       |

**Table S4.** WARDROBELeq computation

| SN | CODE    | REGION         | WARDROBE   |            |            |            |             |             |             |
|----|---------|----------------|------------|------------|------------|------------|-------------|-------------|-------------|
|    |         |                | Main_Large | Main_Small | Deco_Large | Deco_Small | Total Large | Total Small | WARDROBELeq |
| 1  | AV-D-1  | Valle d' Aosta | 2          | 5          | 1          | 1          | 3           | 6           | 4.5         |
| 2  | L-D-1   | Lombardia      | 2          | 0          | 1          | 2          | 3           | 2           | 3.5         |
| 3  | L-D-2   | Lombardia      | 3          | 2          | 2          | 2          | 5           | 4           | 6           |
| 4  | L-D-3   | Lombardia      | 2          | 2          | 2          | 1          | 4           | 3           | 4.75        |
| 5  | P-D-1   | Piemonte       | 2          | 2          | 1          | 1          | 3           | 3           | 3.75        |
| 6  | P-D-2   | Piemonte       | 1          | 2          | 1          | 1          | 2           | 3           | 2.75        |
| 7  | P-D-3   | Piemonte       | 1          | 1          | 1          | 0          | 2           | 1           | 2.25        |
| 8  | P-D-4   | Piemonte       | 2          | 2          | 1          | 0          | 3           | 2           | 3.5         |
| 9  | V-D-1   | Veneto         | 3          | 2          | 1          | 1          | 4           | 3           | 4.75        |
| 10 | V-D-2   | Veneto         | 3          | 3          | 0          | 1          | 3           | 4           | 4           |
| 11 | ER-D-1  | Emilia Romagna | 2          | 1          | 3          | 0          | 5           | 1           | 5.25        |
| 12 | ER-D-2  | Emilia Romagna | 2          | 2          | 0          | 1          | 2           | 3           | 2.75        |
| 13 | ER-D-3  | Emilia Romagna | 2          | 2          | 3          | 0          | 5           | 2           | 5.5         |
| 14 | ER-D-4  | Emilia Romagna | 2          | 1          | 1          | 0          | 3           | 1           | 3.25        |
| 15 | ER-D-5  | Emilia Romagna | 3          | 2          | 1          | 1          | 4           | 3           | 4.75        |
| 16 | ER-D-6  | Emilia Romagna | 2          | 1          | 0          | 2          | 2           | 3           | 2.75        |
| 17 | ER-D-7  | Emilia Romagna | 2          | 2          | 1          | 1          | 3           | 3           | 3.75        |
| 18 | ER-D-8  | Emilia Romagna | 4          | 0          | 0          | 1          | 4           | 1           | 4.25        |
| 19 | ER-D-9  | Emilia Romagna | 1          | 1          | 0          | 1          | 1           | 2           | 1.5         |
| 20 | ER-D-10 | Emilia Romagna | 1          | 3          | 0          | 1          | 1           | 4           | 2           |
| 21 | ER-D-11 | Emilia Romagna | 2          | 2          | 1          | 0          | 3           | 2           | 3.5         |
| 22 | ER-D-12 | Emilia Romagna | 2          | 2          | 2          | 0          | 4           | 2           | 4.5         |
| 23 | AV-A-1  | Valle d' Aosta | 2          | 1          | 2          | 0          | 4           | 1           | 4.25        |
| 24 | AV-A-2  | Valle d' Aosta | 2          | 2          | 0          | 1          | 2           | 3           | 2.75        |
| 25 | AV-A-3  | Valle d' Aosta | 1          | 1          | 1          | 0          | 2           | 1           | 2.25        |
| 26 | AV-A-4  | Valle d' Aosta | 1          | 1          | 0          | 1          | 1           | 2           | 1.5         |
| 27 | AV-A-5  | Valle d' Aosta | 1          | 1          | 0          | 1          | 1           | 2           | 1.5         |
| 28 | L-A-1   | Lombardia      | 2          | 3          | 1          | 1          | 3           | 4           | 4           |



| SN | CODE    | REGION         | WARDROBE   |            |            |            |             |             |             |
|----|---------|----------------|------------|------------|------------|------------|-------------|-------------|-------------|
|    |         |                | Main_Large | Main_Small | Deco_Large | Deco_Small | Total Large | Total Small | WARDROBELeq |
| 29 | L-A-2   | Lombardia      | 2          | 1          | 0          | 1          | 2           | 2           | 2.5         |
| 30 | P-A-1   | Piemonte       | 1          | 1          | 0          | 1          | 1           | 2           | 1.5         |
| 31 | P-A-2   | Piemonte       | 1          | 3          | 3          | 0          | 4           | 3           | 4.75        |
| 32 | P-A-3   | Piemonte       | 2          | 2          | 1          | 1          | 3           | 3           | 3.75        |
| 33 | P-A-4   | Piemonte       | 0          | 2          | 0          | 1          | 0           | 3           | 0.75        |
| 34 | P-A-5   | Piemonte       | 3          | 2          | 4          | 0          | 7           | 2           | 7.5         |
| 35 | P-A-6   | Piemonte       | 1          | 1          | 1          |            | 2           | 1           | 2.25        |
| 36 | V-A-1   | Veneto         | 2          | 1          | 0          | 1          | 2           | 2           | 2.5         |
| 37 | V-A-2   | Veneto         | 2          | 2          | 0          | 1          | 2           | 3           | 2.75        |
| 38 | ER-A-1  | Emilia Romagna | 2          | 2          | 1          |            | 3           | 2           | 3.5         |
| 39 | AV-AP-1 | Valle d' Aosta | 2          | 2          | 1          | 1          | 3           | 3           | 3.75        |
| 40 | L-AP-1  | Lombardia      | 2          | 4          | 0          | 1          | 2           | 5           | 3.25        |
| 41 | L-AP-2  | Lombardia      | 2          | 1          | 0          | 1          | 2           | 2           | 2.5         |
| 42 | L-AP-3  | Lombardia      | 1          | 0          | 0          | 1          | 1           | 1           | 1.25        |
| 43 | L-AP-4  | Lombardia      | 1          | 2          | 1          | 1          | 2           | 3           | 2.75        |
| 44 | L-AP-5  | Lombardia      | 3          | 4          | 2          | 0          | 5           | 4           | 6           |
| 45 | L-AP-6  | Lombardia      | 3          | 2          | 2          | 0          | 5           | 2           | 5.5         |
| 46 | L-AP-7  | Lombardia      | 2          | 2          | 1          | 0          | 3           | 2           | 3.5         |
| 47 | L-AP-8  | Lombardia      | 1          | 1          | 0          | 1          | 1           | 2           | 1.5         |
| 48 | L-AP-9  | Lombardia      | 2          | 2          | 0          | 1          | 2           | 3           | 2.75        |
| 49 | L-AP-10 | Lombardia      | 1          | 0          | 0          | 1          | 1           | 1           | 1.25        |
| 50 | L-AP-11 | Lombardia      | 1          | 3          | 2          | 0          | 3           | 3           | 3.75        |
| 51 | P-AP-1  | Piemonte       | 2          | 2          | 0          | 1          | 2           | 3           | 2.75        |
| 52 | P-AP-2  | Piemonte       | 3          | 3          | 1          | 0          | 4           | 3           | 4.75        |
| 53 | P-AP-3  | Piemonte       | 2          | 2          | 0          | 1          | 2           | 3           | 2.75        |
| 54 | P-AP-4  | Piemonte       | 2          | 2          | 1          | 0          | 3           | 2           | 3.5         |
| 55 | P-AP-5  | Lombardia      | 1          | 1          | 0          | 1          | 1           | 2           | 1.5         |
| 56 | ER-AP-1 | Emilia Romagna | 2          | 2          | 0          | 1          | 2           | 3           | 2.75        |
| 57 | ER-AP-2 | Emilia Romagna | 2          | 2          | 0          | 1          | 2           | 3           | 2.75        |

| SN | CODE    | REGION         | WARDROBE   |            |            |            |             |             |             |
|----|---------|----------------|------------|------------|------------|------------|-------------|-------------|-------------|
|    |         |                | Main_Large | Main_Small | Deco_Large | Deco_Small | Total Large | Total Small | WARDROBELeq |
| 58 | ER-AP-3 | Emilia Romagna | 2          | 2          | 1          | 0          | 3           | 2           | 3.5         |
| 59 | ER-AP-4 | Emilia Romagna | 2          | 2          | 0          | 1          | 2           | 3           | 2.75        |
| 60 | ER-AP-5 | Emilia Romagna | 2          | 2          | 1          | 0          | 3           | 2           | 3.5         |

**Table S5.** 6CHAIReq & TVeq computation

| SN | CODE    | REGION         | DINING SETUP |        |          | TV              |                 |      |
|----|---------|----------------|--------------|--------|----------|-----------------|-----------------|------|
|    |         |                | Type         | Chairs | 6CHAIReq | PC + TV screens | Base Height (m) | TVeq |
| 1  | AV-D-1  | Valle d' Aosta | 4-Seater     | 4      | 0.67     | 2               | 0.5, 1.25       | 2    |
| 2  | L-D-1   | Lombardia      | 4- Seater    | 4      | 0.67     | 1               | 0.75            | 1    |
| 3  | L-D-2   | Lombardia      | 6-Seater     | 6      | 1        | 3               | 1, 0.75, 0.5    | 3    |
| 4  | L-D-3   | Lombardia      | 8-Seater     | 8      | 1.33     | 4               | 0.5, 3x0.75     | 4    |
| 5  | P-D-1   | Piemonte       | 4-Seater     | 4      | 0.67     | *               | *               | 0    |
| 6  | P-D-2   | Piemonte       | 4-Seater     | 4      | 0.67     | 3               | 3x1             | 3    |
| 7  | P-D-3   | Piemonte       | 4-Seater     | 4      | 0.67     | *               | *               | 0    |
| 8  | P-D-4   | Piemonte       | 4 & 6-Seater | 10     | 1.67     | 2               | 0.75, 1         | 2    |
| 9  | V-D-1   | Veneto         | 4-Seater     | 4      | 0.67     | 2               | 2x1             | 2    |
| 10 | V-D-2   | Veneto         | 6-Seater     | 6      | 1        | 1               | 0.75            | 1    |
| 11 | ER-D-1  | Emilia Romagna | 4-Seater     | 4      | 0.67     | 2               | 0.5, 0.75       | 2    |
| 12 | ER-D-2  | Emilia Romagna | 5-Seater     | 5      | 0.83     | 2               | 0.5, 1.75       | 2    |
| 13 | ER-D-3  | Emilia Romagna | 4 & 5-Seater | 9      | 1.5      | 2               | 0.75, 1.25      | 2    |
| 14 | ER-D-4  | Emilia Romagna | 6-Seater     | 6      | 1        | *               | *               | 0    |
| 15 | ER-D-5  | Emilia Romagna | 6-Seater     | 6      | 1        | 3               | 0.75, 1, 1.5    | 3    |
| 16 | ER-D-6  | Emilia Romagna | 4-Seater     | 4      | 0.67     | 2               | 0.75, 1.75      | 2    |
| 17 | ER-D-7  | Emilia Romagna | 4 & 6-Seater | 10     | 1.67     | 2               | 0.75,1          | 2    |
| 18 | ER-D-8  | Emilia Romagna | 6 & 6-Seater | 12     | 2        | 3               | 2x1.5, 1.75     | 3    |
| 19 | ER-D-9  | Emilia Romagna | 4-Seater     | 4      | 0.67     | *               | *               | 0    |
| 20 | ER-D-10 | Emilia Romagna | 4-Seater     | 4      | 0.67     | 2               | 2x0.75          | 2    |
| 21 | ER-D-11 | Emilia Romagna | 4-Seater     | 4      | 0.67     | 4               | 1, 3x1.75       | 4    |

| SN | CODE    | REGION         | DINING SETUP |        |          | TV              |                 |      |
|----|---------|----------------|--------------|--------|----------|-----------------|-----------------|------|
|    |         |                | Type         | Chairs | 6CHAIReq | PC + TV screens | Base Height (m) | TVeq |
| 22 | ER-D-12 | Emilia Romagna | 4 & 6-Seater | 10     | 1.67     | 1               | 1               | 1    |
| 23 | AV-A-1  | Valle d' Aosta | 4-Seater     | 4      | 0.67     | *               | *               | 0    |
| 24 | AV-A-2  | Valle d' Aosta | 6-Seater     | 6      | 1        | *               | *               | 0    |
| 25 | AV-A-3  | Valle d' Aosta | 6-Seater     | 6      | 1        | 2               | 2x1             | 2    |
| 26 | AV-A-4  | Valle d' Aosta | 3-Seater     | 3      | 0.5      | 3               | 0.75, 2x1       | 3    |
| 27 | AV-A-5  | Valle d' Aosta | 4-Seater     | 4      | 0.67     | 1               | 0.5             | 1    |
| 28 | L-A-1   | Lombardia      | 4 & 4-Seater | 8      | 1.33     | 3               | 0.5, 1.25, 1.75 | 3    |
| 29 | L-A-2   | Lombardia      | 4 & 6-Seater | 10     | 1.67     | 2               | 2x 0.5          | 2    |
| 30 | P-A-1   | Piemonte       | 4-Seater     | 4      | 0.67     | 1               | 1               | 1    |
| 31 | P-A-2   | Piemonte       | 4-Seater     | 4      | 0.67     | 3               | 1, 1.5, 1.75    | 3    |
| 32 | P-A-3   | Piemonte       | 4-Seater     | 4      | 0.67     | 2               | 1, 1            | 2    |
| 33 | P-A-4   | Piemonte       | 4 & 6-Seater | 10     | 1.67     | 1               | 1               | 1    |
| 34 | P-A-5   | Piemonte       | 4 & 6-Seater | 10     | 1.67     | 1               | 1               | 1    |
| 35 | P-A-6   | Piemonte       | 4-Seater     | 4      | 0.67     | 1               | 1               | 1    |
| 36 | V-A-1   | Veneto         | 6-Seater     | 6      | 1        | 1               | 0.5             | 1    |
| 37 | V-A-2   | Veneto         | 6-Seater     | 6      | 1        | 2               | 0.5, 1          | 2    |
| 38 | ER-A-1  | Emilia Romagna | 4-Seater     | 4      | 0.67     | 1               | 1.5             | 1    |
| 39 | AV-AP-1 | Valle d' Aosta | 5 & 6-Seater | 11     | 1.83     | 1               | 0.75            | 1    |
| 40 | L-AP-1  | Lombardia      | 6-Seater     | 6      | 1        | 1               | 0.5             | 1    |
| 41 | L-AP-2  | Lombardia      | 4-Seater     | 4      | 0.67     | 1               | 1               | 1    |
| 42 | L-AP-3  | Lombardia      | 4-Seater     | 4      | 0.67     | 1               | 0.5             | 1    |
| 43 | L-AP-4  | Lombardia      | 2-Seater     | 2      | 0.33     | 1               | 0.5             | 1    |
| 44 | L-AP-5  | Lombardia      | 4 & 5-Seater | 9      | 1.5      | 2               | 0.5, 0.75       | 2    |
| 45 | L-AP-6  | Lombardia      | 6-Seater     | 6      | 1        | 1               | 0.5             | 1    |
| 46 | L-AP-7  | Lombardia      | 4-Seater     | 4      | 0.67     | 1               | 0.75            | 1    |
| 47 | L-AP-8  | Lombardia      | 2-Seater     | 2      | 0.33     | *               | *               | 0    |
| 48 | L-AP-9  | Lombardia      | 6-Seater     | 6      | 1        | 1               | 0.75            | 1    |
| 49 | L-AP-10 | Lombardia      | 2-Seater     | 2      | 0.33     | *               | *               | 0    |
| 50 | L-AP-11 | Lombardia      | 6-Seater     | 6      | 1        | 2               | 0.5, 1.25       | 2    |

| SN | CODE    | REGION         | DINING SETUP |        |          | TV              |                      |      |
|----|---------|----------------|--------------|--------|----------|-----------------|----------------------|------|
|    |         |                | Type         | Chairs | 6CHAIReq | PC + TV screens | Base Height (m)      | TVeq |
| 51 | P-AP-1  | Piemonte       | 4-Seater     | 4      | 0.67     | 2               | 0.5, 1.25            | 2    |
| 52 | P-AP-2  | Piemonte       | 4-Seater     | 4      | 0.67     | 1               | 1.5                  | 1    |
| 53 | P-AP-3  | Piemonte       | 6-Seater     | 6      | 1        | 1               | 0.75                 | 1    |
| 54 | P-AP-4  | Piemonte       | 4-Seater     | 4      | 0.67     | 3               | 1, 2x1.25            | 3    |
| 55 | P-AP-5  | Lombardia      | 4 & 4-Seater | 8      | 1.33     | 1               | 1                    | 1    |
| 56 | ER-AP-1 | Emilia Romagna | 4-Seater     | 4      | 0.67     | 2               | 1, 1.75              | 2    |
| 57 | ER-AP-2 | Emilia Romagna | 6-Seater     | 6      | 1        | 1               | 1                    | 1    |
| 58 | ER-AP-3 | Emilia Romagna | 4 & 4-Seater | 8      | 1.33     | 3               | 0.5, 1, 1.5          | 3    |
| 59 | ER-AP-4 | Emilia Romagna | 4-Seater     | 4      | 0.67     | 5               | 2x0.75, 1, 1.5, 1.75 | 5    |
| 60 | ER-AP-5 | Emilia Romagna | 4 & 5-Seater | 9      | 1.5      | 2               | 1                    | 2    |

**Table S6.** Kitchen & electronics details

| SN | CODE   | REGION         | KITCHEN & EQUIPMENT |      |                 |              |               |            |
|----|--------|----------------|---------------------|------|-----------------|--------------|---------------|------------|
|    |        |                | Microwave           | Oven | Washing Machine | Refrigerator | Kitchen Setup | Dishwasher |
| 1  | AV-D-1 | Valle d' Aosta | 0                   | 1    | 1               | 1            | 1             | 0          |
| 2  | L-D-1  | Lombardia      | 1                   | 1    | 1               | 1            | 1             | 0          |
| 3  | L-D-2  | Lombardia      | 0                   | 1    | 1               | 1            | 1             | 1          |
| 4  | L-D-3  | Lombardia      | 1                   | 1    | 1               | 1            | 1             | 0          |
| 5  | P-D-1  | Piemonte       | 0                   | 1    | 1               | 1            | 1             | 0          |
| 6  | P-D-2  | Piemonte       | 0                   | 1    | 1               | 1            | 1             | 0          |
| 7  | P-D-3  | Piemonte       | 0                   | 1    | 1               | 1            | 1             | 0          |
| 8  | P-D-4  | Piemonte       | 0                   | 1    | 1               | 1            | 1             | 0          |
| 9  | V-D-1  | Veneto         | 1                   | 1    | 1               | 1            | 1             | 0          |
| 10 | V-D-2  | Veneto         | 1                   | 1    | 1               | 1            | 1             | 0          |
| 11 | ER-D-1 | Emilia Romagna | 0                   | 1    | 1               | 1            | 1             | 1          |
| 12 | ER-D-2 | Emilia Romagna | 1                   | 1    | 1               | 1            | 1             | 0          |
| 13 | ER-D-3 | Emilia Romagna | 1                   | 1    | 1               | 1            | 1             | 1          |
| 14 | ER-D-4 | Emilia Romagna | 0                   | 1    | 1               | 1            | 1             | 1          |

| SN | CODE    | REGION         | KITCHEN & EQUIPMENT |      |                 |              |               |            |
|----|---------|----------------|---------------------|------|-----------------|--------------|---------------|------------|
|    |         |                | Microwave           | Oven | Washing Machine | Refrigerator | Kitchen Setup | Dishwasher |
| 15 | ER-D-5  | Emilia Romagna | 1                   | 1    | 1               | 1            | 1             | 0          |
| 16 | ER-D-6  | Emilia Romagna | 1                   | 1    | 1               | 1            | 1             | 1          |
| 17 | ER-D-7  | Emilia Romagna | 0                   | 1    | 1               | 1            | 1             | 0          |
| 18 | ER-D-8  | Emilia Romagna | 0                   | 1    | 1               | 1            | 1             | 1          |
| 19 | ER-D-9  | Emilia Romagna | 0                   | 1    | 1               | 1            | 1             | 0          |
| 20 | ER-D-10 | Emilia Romagna | 1                   | 1    | 1               | 1            | 1             | 0          |
| 21 | ER-D-11 | Emilia Romagna | 1                   | 1    | 1               | 1            | 1             | 0          |
| 22 | ER-D-12 | Emilia Romagna | 0                   | 1    | 1               | 1            | 1             | 0          |
| 23 | AV-A-1  | Valle d' Aosta | 0                   | 1    | 1               | 1            | 1             | 1          |
| 24 | AV-A-2  | Valle d' Aosta | 0                   | 1    | 1               | 1            | 1             | 1          |
| 25 | AV-A-3  | Valle d' Aosta | 0                   | 1    | 1               | 1            | 1             | 0          |
| 26 | AV-A-4  | Valle d' Aosta | 1                   | 1    | 1               | 1            | 1             | 0          |
| 27 | AV-A-5  | Valle d' Aosta | 1                   | 1    | 1               | 1            | 1             | 0          |
| 28 | L-A-1   | Lombardia      | 1                   | 1    | 1               | 1            | 1             | 1          |
| 29 | L-A-2   | Lombardia      | 0                   | 1    | 1               | 1            | 1             | 0          |
| 30 | P-A-1   | Piemonte       | 1                   | 1    | 1               | 1            | 1             | 1          |
| 31 | P-A-2   | Piemonte       | 1                   | 1    | 1               | 1            | 1             | 1          |
| 32 | P-A-3   | Piemonte       | 1                   | 1    | 1               | 1            | 1             | 0          |
| 33 | P-A-4   | Piemonte       | 1                   | 1    | 1               | 1            | 1             | 0          |
| 34 | P-A-5   | Piemonte       | 1                   | 1    | 1               | 1            | 1             | 0          |
| 35 | P-A-6   | Piemonte       | 1                   | 1    | 1               | 1            | 1             | 1          |
| 36 | V-A-1   | Veneto         | 1                   | 1    | 1               | 1            | 1             | 0          |
| 37 | V-A-2   | Veneto         | 1                   | 1    | 1               | 1            | 1             | 0          |
| 38 | ER-A-1  | Emilia Romagna | 0                   | 1    | 1               | 1            | 1             | 0          |
| 39 | AV-AP-1 | Valle d' Aosta | 1                   | 1    | 1               | 1            | 1             | 0          |
| 40 | L-AP-1  | Lombardia      | 0                   | 1    | 1               | 1            | 1             | 0          |
| 41 | L-AP-2  | Lombardia      | 0                   | 1    | 1               | 1            | 1             | 0          |
| 42 | L-AP-3  | Lombardia      | 1                   | 1    | 1               | 1            | 1             | 0          |
| 43 | L-AP-4  | Lombardia      | 1                   | 1    | 1               | 1            | 1             | 1          |

| SN | CODE    | REGION         | KITCHEN & EQUIPMENT |      |                 |              |               |            |
|----|---------|----------------|---------------------|------|-----------------|--------------|---------------|------------|
|    |         |                | Microwave           | Oven | Washing Machine | Refrigerator | Kitchen Setup | Dishwasher |
| 44 | L-AP-5  | Lombardia      | 1                   | 1    | 1               | 1            | 1             | 0          |
| 45 | L-AP-6  | Lombardia      | 0                   | 1    | 1               | 1            | 1             | 0          |
| 46 | L-AP-7  | Lombardia      | 1                   | 1    | 1               | 1            | 1             | 0          |
| 47 | L-AP-8  | Lombardia      | 0                   | 1    | 1               | 1            | 1             | 0          |
| 48 | L-AP-9  | Lombardia      | 0                   | 1    | 1               | 1            | 1             | 0          |
| 49 | L-AP-10 | Lombardia      | 0                   | 1    | 1               | 1            | 1             | 0          |
| 50 | L-AP-11 | Lombardia      | 1                   | 1    | 1               | 1            | 1             | 1          |
| 51 | P-AP-1  | Piemonte       | 1                   | 1    | 1               | 1            | 1             | 0          |
| 52 | P-AP-2  | Piemonte       | 1                   | 1    | 1               | 1            | 1             | 1          |
| 53 | P-AP-3  | Piemonte       | 1                   | 1    | 1               | 1            | 1             | 0          |
| 54 | P-AP-4  | Piemonte       | 0                   | 1    | 1               | 1            | 1             | 0          |
| 55 | P-AP-5  | Lombardia      | 0                   | 1    | 1               | 1            | 1             | 0          |
| 56 | ER-AP-1 | Emilia Romagna | 1                   | 1    | 1               | 1            | 1             | 1          |
| 57 | ER-AP-2 | Emilia Romagna | 0                   | 1    | 1               | 1            | 1             | 1          |
| 58 | ER-AP-3 | Emilia Romagna | 1                   | 1    | 1               | 1            | 1             | 0          |
| 59 | ER-AP-4 | Emilia Romagna | 1                   | 1    | 1               | 1            | 1             | 1          |
| 60 | ER-AP-5 | Emilia Romagna | 0                   | 1    | 1               | 1            | 1             | 0          |
