# Supplementary material for: INSYDE-content: a synthetic, multi-variable flood damage model for household contents
Source: Copernicus journal article supplement (doi:10.5194/nhess-25-4317-2025), 2025-11-04
Supplement: Supplementary file [file nhess-25-4317-2025-supplement-title-page.pdf › nhess-25-4317-2025-supplement-title-page.pdf]

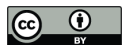

*Supplement of*

## **INSYDE-content: a synthetic, multi-variable flood damage model for household contents**

**Pradeep Acharya et al.**

*Correspondence to:* Anna Rita Scorzini ([annarita.scorzini@univaq.it](mailto:annarita.scorzini@univaq.it))

- [nhess-25-4317-2025-supplement-title-page.pdf](#)
- [Supplement\\_1.pdf](#)
- [Supplement\\_2.pdf](#)

The copyright of individual parts of the supplement might differ from the article licence.
